# Supplementary material for: Total Synthesis of Hemerocallisamine I Paved by Gram-Scale Synthesis of (2S,4S)-4-Hydroxyglutamic Acid Lactone
Source: MDPI journal article supplement (doi:10.3390/molecules28052177), 2023-02-26
Supplement: s1 [file s1]

## SUPPORTING INFORMATION

### Total Synthesis of Hemerocallisamine I Paved by Gram Scale Synthesis of (2*S*,4*S*)-4-Hydroxyglutamic Acid Lactone

|                                                                                       |     |
|---------------------------------------------------------------------------------------|-----|
| 1. Materials and methods                                                              | S2  |
| 2. Synthesis and characterization of compounds <b>6</b> , <b>4</b> and rac- <b>12</b> | S2  |
| 3. HPLC data for compounds ( <i>S,S</i> )- <b>8</b> and ( <i>S,S</i> )- <b>1</b>      | S5  |
| 4. Optimization of the Maillard reaction                                              | S7  |
| 5. X-ray analysis of compound ( <i>S,S</i> )- <b>1</b>                                | S9  |
| 6. <sup>1</sup> H and <sup>13</sup> C NMR spectra                                     | S10 |
| 7. References                                                                         | S28 |

## 1. Materials and methods

Unless otherwise noted, all chemicals were purchased from commercial sources and used without further purifications. Column chromatography was carried out using silica 60 A, Davisil, purchased from Fisher Chemicals. Reactions were monitored by thin layer chromatography (TLC), using Macherey-Nagel's pre-coated TLC sheets POLYGRAM SIL G/UV254, which were visualized under UV light (254 nm) or by staining with aqueous basic potassium permanganate or cerium molybdate solutions as appropriate. HPLC analyses were performed on a Varian system using a Macherey-Nagel EC 250/4 Nucleodur Phenyl-Hexyl 5  $\mu$ m, CHIRAL ART, Amylose-SA, 250 x 4.6 mm, 5  $\mu$ m and Astec CHIROBIOTIC  $\text{®T}$ , 250 x 4.6 mm, 5  $\mu$ m column. All  $^1\text{H}$  and  $^{13}\text{C}$  NMR spectra were recorded using Bruker Avance NEO 400 MHz and/or Varian 400 MR spectrometers. Chemical shifts ( $\delta$ ) are given in parts per million (ppm). The  $^1\text{H}$  NMR chemical shift scale is referenced to the TMS internal standard ( $\delta$  = 0 ppm) or solvent residual peak ( $\delta$  = 2.50 ppm for  $\text{DMSO-}d_6$  and  $\delta$  = 7.26 ppm for  $\text{CDCl}_3$ ). The  $^{13}\text{C}$  NMR chemical shift scale is referenced to the solvent residual peak ( $\delta$  = 39.52 ppm for  $\text{DMSO-}d_6$  and  $\delta$  = 77.16 ppm for  $\text{CDCl}_3$ ). Coupling constants ( $J$ ) are given in hertz (Hz). The multiplicity of  $^1\text{H}$  NMR signals is reported as follows: s = singlet, d = doublet, t = triplet, q = quartet, m = multiplet, bs = broad singlet, "t" for dd with two identical or similar coupling constants, "dt" or "td" for ddd with two identical or similar coupling constants and "q" for ddd with three identical or similar coupling constants. High-resolution mass spectra were measured using Thermo Scientific mass spectrometer with Orbitrap analyzer and HESI ionization.

## 2. Synthesis and characterization of compounds

### (*E*)-4-(4-methoxyphenyl)-4-oxobut-2-enoic acid (**6**)

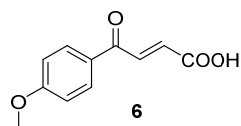

Anisole (20.0 g, 0.185 mol) was dissolved in  $\text{CH}_2\text{Cl}_2$  (111 ml), and then maleic anhydride (27.2 g, 0.277 mol, 1.5 equiv) and  $\text{AlCl}_3$  (37.0 g, 0.277 mol, 1.5 equiv) were added. The reaction mixture was stirred for 20 h at rt. After completion, the reaction mixture was quenched with  $\text{H}_2\text{O}$  (100 ml) and  $\text{CH}_2\text{Cl}_2$  was evaporated under reduced pressure. The residue was diluted with  $\text{H}_2\text{O}$  (150 ml) and extracted with EtOAc (3 x 150 ml). The collected organic layers were washed with saturated brine (200 ml), dried over anhydrous  $\text{Na}_2\text{SO}_4$ , and concentrated *in vacuo*, yielding a crude product that was crystallized from EtOAc (120 ml). Acid **6** (21.0 g, 0.102 mol, 55%) was isolated as a yellow solid. The  $^1\text{H}$  NMR spectrum of **6** was consistent with the published data.<sup>1</sup>

### 6-(((*tert*-Butyldimethylsilyl)oxy)methyl)-6-hydroxy-2H-pyran-3(6H)-one (**4**)

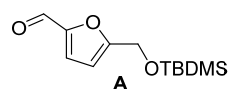

Step 1: Imidazole (5.94 g, 87.2 mmol, 1.1 equiv) and 5-hydroxymethylfurfural (10.0 g, 79.3 mmol) were stirred in  $\text{CH}_2\text{Cl}_2$  (198 ml) for 15 minutes at rt. TBDMSCl (12.5 g, 83.3 mmol, 1.05 equiv) was added afterwards and the reaction mixture was stirred at rt, under argon, while being monitored by TLC. After 16 h  $\text{H}_2\text{O}$  (200 ml) was added, the organic phase was separated, and the aqueous phase was extracted with  $\text{CH}_2\text{Cl}_2$  (2 x 150 ml). The combined organic solutions were dried over anhydrous  $\text{Na}_2\text{SO}_4$  and concentrated *in vacuo*, providing carbaldehyde **A** (18.3 g, 76.1 mmol, 96%) as an orange oil.

Rf 0.77 (EtOAc:Hex 1:5)

$^1\text{H}$  NMR (300 MHz,  $\text{CDCl}_3$ ) :  $\delta$  9.59 (s, 1H), 7.20 (d,  $J$  = 3.6 Hz, 1H), 6.47 (dt,  $J$  = 3.5, 0.8 Hz, 1H), 4.73 (d,  $J$  = 0.5 Hz, 2H), 0.92 (s, 9H), 0.10 (s, 6H).

$^1\text{H}$ -NMR spectrum of **A** was consistent with the published data.<sup>2</sup>

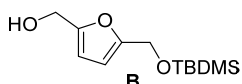

Step 2:  $\text{NaBH}_4$  (5.76 g, 152 mmol, 2.0 equiv) was added portionwise to a solution of carbaldehyde **A** (18.3 g, 76.1 mmol) in MeOH (400 ml) at 0 °C, and the reaction mixture was stirred at this temperature for 45 min. Then  $\text{H}_2\text{O}$  (200 ml) was added and MeOH was removed *in vacuo*. The residue was diluted with  $\text{H}_2\text{O}$  (200 ml) and extracted with EtOAc (250 and 2 x 200ml). The combined organic layers were dried over anhydrous  $\text{Na}_2\text{SO}_4$  and concentrated under reduced pressure. The crude product was purified by flash column chromatography (EtOAc:Hex, 1:1 to 3:1) to give **B** (15.0 g, 61.9 mmol, 81%) as a pale-yellow oil.

Rf 0.44 (EtOAc:Hex 1:4)

$^1\text{H}$  NMR (300 MHz,  $\text{CDCl}_3$ ) :  $\delta$  = 6.24 – 6.20 (m, 1H), 6.17 (d,  $J$  = 3.1 Hz, 1H), 4.62 (s, 2H), 4.59 (s, 2H), 1.78 (s, 1H), 0.90 (s, 9H), 0.08 (s, 6H).

$^1\text{H}$ -NMR spectrum of **B** was consistent with the published data.<sup>3</sup>

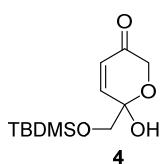

Step 3: *m*-CPBA (18.0 g, 80.5 mmol 1.3 equiv) was added to a solution of **B** (15 g, 61.8 mmol) in  $\text{CH}_2\text{Cl}_2$  (495 ml) at 0 °C and the mixture was allowed to stir at this temperature for 0.5 h. Afterwards the mixture was let to reach rt and was stirred for additional 4 h while being monitored by TLC. The reaction was quenched with a saturated aqueous  $\text{Na}_2\text{SO}_3$  solution (150 ml), followed by neutralisation to pH 7–8 with 1M aqueous NaOH. The mixture was extracted with  $\text{CH}_2\text{Cl}_2$  (2 x 80 mL), the combined organic extracts were washed with brine and dried over anhydrous  $\text{Na}_2\text{SO}_4$  to give dihydropyranone **4** (13.4 g, 51.9 mmol, 83%) as an off-white solid.

Mp 83 – 84 °C; Rf 0.55 (EtOAc:Hex 1:5)

$^1\text{H}$  NMR (400 MHz,  $\text{CDCl}_3$ ) :  $\delta$  = 6.79 (d,  $J$  = 10.4 Hz, 1H), 6.15 (d,  $J$  = 10.4 Hz, 1H), 4.59 (d,  $J$  = 16.9 Hz, 1H), 4.14 (d,  $J$  = 17.0 Hz, 1H), 3.77 (d,  $J$  = 10.2 Hz, 1H), 3.68 (d,  $J$  = 10.2 Hz, 1H), 0.93 (s, 9H), 0.12 (s, 6H).

$^1\text{H}$ -NMR spectrum of **4** was consistent with the published data.<sup>3</sup>

### Isolation of the diketopiperazine byproduct rac-12

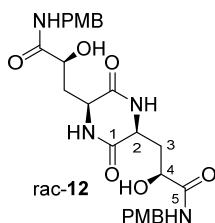

Amine rac-**11** (153.0 mg, 0.579 mmol) was dissolved in dry  $\text{CH}_2\text{Cl}_2$  (2.9 ml) and dihydropyranone **4** (149.6 mg, 0.579 mmol, 1.0 equiv) was added. The reaction mixture was stirred at rt under argon. After 14 h, the reaction mixture was concentrated *in vacuo* and the crude product was treated with a mixture of MeOH and  $\text{Et}_2\text{O}$  (1:1, 2 ml). The precipitate was filtered off and washed with a small amount of MeOH and  $\text{Et}_2\text{O}$ , yielding rac-**12** as a white solid (13.0 mg, 0.025 mmol, 9% yield with respect to the reaction stoichiometry rac-**11**/rac-**12** 2:1).

$^1\text{H}$  NMR (400 MHz,  $\text{DMSO}-d_6$ ) :  $\delta$  = 8.32 – 8.25 (m, 2H, 2xPMB-NH), 8.23 (m, 2H, 2xNH), 7.18 (d,  $J$  = 8.7 Hz, 4H, 2xPMB-Ar), 6.86 (d,  $J$  = 8.5 Hz, 4H, 2xPMB-Ar), 5.84 (d,  $J$  = 5.5 Hz, 1H, OH), 5.79 (d,  $J$  = 5.5 Hz, 1H, OH),

4.22 (d,  $J = 6.2$  Hz, 4H, 2xPMB-CH<sub>2</sub>), 4.19 – 4.12 (m, 2H, 2xH-4), 4.01 – 3.93 (m, 2H, 2xH-2), 3.72 (s, 6H, 2xPMB-Me), 2.05 – 1.83 (m, 4H, 2xH-3)

<sup>1</sup>H NMR was assigned on the basis of 2D NMR, the numbering is specified in the figure.

<sup>13</sup>C NMR (101 MHz, DMSO-*d*<sub>6</sub>):  $\delta = 173.28$  (C-5), 168.51 (C-1), 158.16 (PMB-Ar), 131.54 (PMB-Ar), 128.53 (PMB-Ar), 113.63 (PMB-Ar), 68.00 (C-4), 55.03 (PMB-Me), 51.58 (C-2), 41.23 (PMB-CH<sub>2</sub>), 37.56 (C-3).

HRMS–HESI ( $m/z$ ): calcd for C<sub>26</sub>H<sub>32</sub>N<sub>4</sub>O<sub>8</sub>Na [M+Na]<sup>+</sup>, 551.21124, found 551.21137.

### 3. HPLC data for compounds (S,S)-8 and (S,S)-1

**HPLC conditions:** CHIRAL ART, Amylose-SA, 250 x 4.6 mm, 5 µm.

Mobile Phase: Hexane:Propan-2-ol 6:1,  $\lambda$  = 254 nm, flow 1 ml/min

er > 99:1

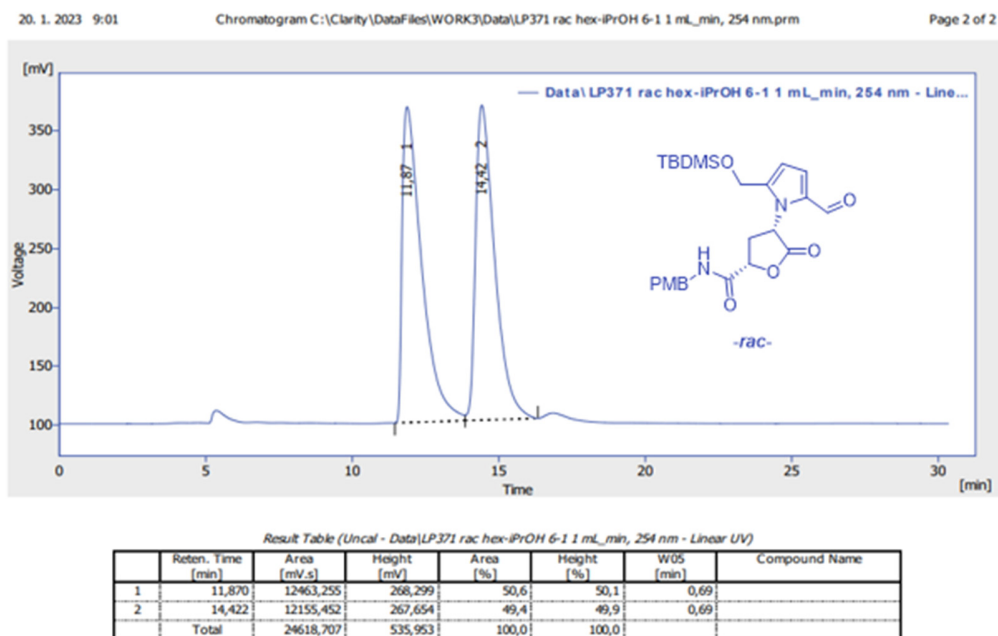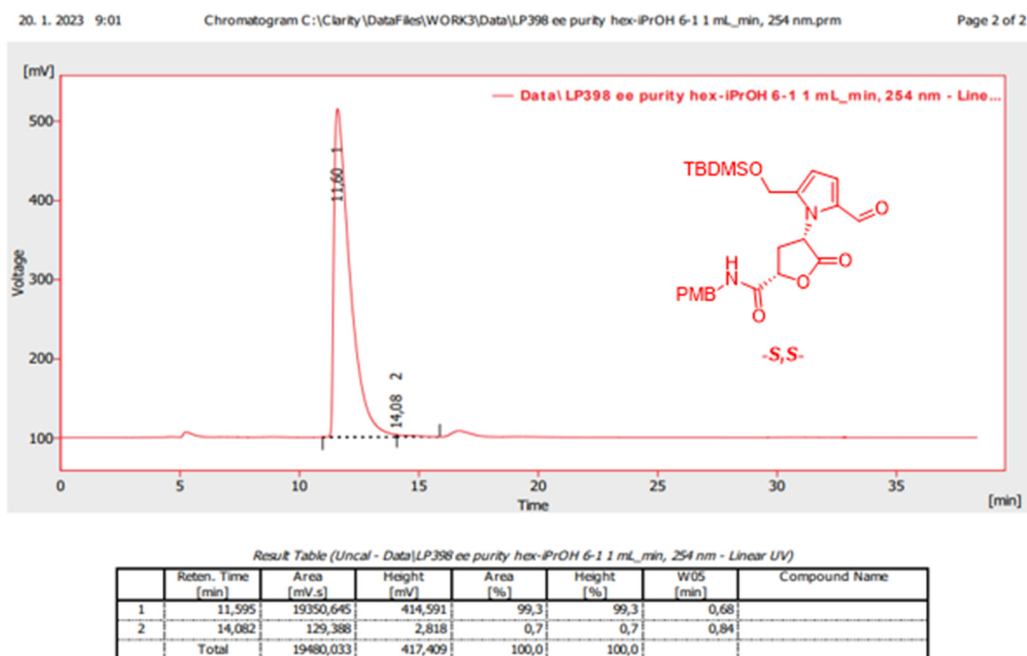

**HPLC conditions:** Astec CHIROBIOTIC ®T, 250 x 4.6 mm, 5 µm.  
 Mobile Phase: Methanol:Water 2:98, λ = 254 nm, flow 1 ml/min  
 er > 99:1

20. 1. 2023 8:55 Chromatogram C:\Clarity\DataFiles\WORK3\Data\LP hemerocallisamine I rac MeOH-H2O 2-98 17-1-22, 1 mL\_min, 254 nm.prm

Page 2 of 2

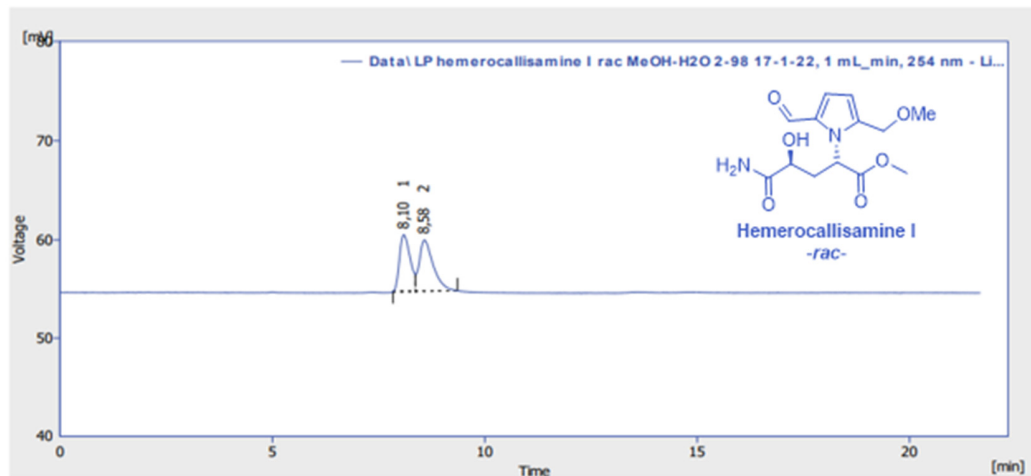

Result Table (Uncal - Data\LP hemerocallisamine I rac MeOH-H2O 2-98 17-1-22, 1 mL\_min, 254 nm - Linear UV)

|       | Reten. Time<br>[min] | Area<br>[mV.s] | Height<br>[mV] | Area<br>[%] | Height<br>[%] | W05<br>[min] | Compound Name |
|-------|----------------------|----------------|----------------|-------------|---------------|--------------|---------------|
| 1     | 8,095                | 99,625         | 5,712          | 45,5        | 52,6          | 0,29         |               |
| 2     | 8,578                | 119,320        | 5,149          | 54,5        | 47,4          | 0,35         |               |
| Total |                      | 218,945        | 10,861         | 100,0       | 100,0         |              |               |

20. 1. 2023 8:55 Chromatogram C:\Clarity\DataFiles\WORK3\Data\LP hemerocallisamine I enantiomer MeOH-H2O 2-98 17-1-22, 1 mL\_min, 254 nm.prm

Page 2 of 2

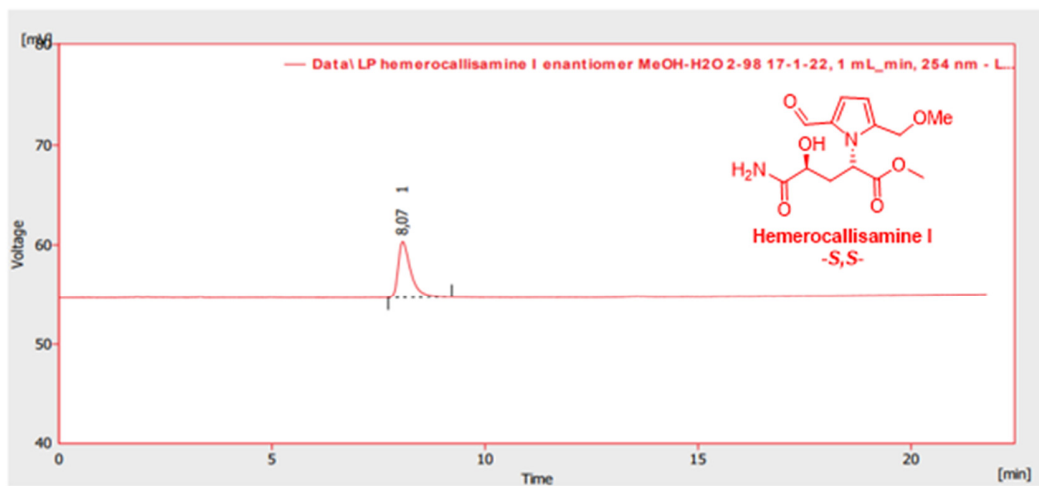

Result Table (Uncal - Data\LP hemerocallisamine I enantiomer MeOH-H2O 2-98 17-1-22, 1 mL\_min, 254 nm - Linear UV)

|       | Reten. Time<br>[min] | Area<br>[mV.s] | Height<br>[mV] | Area<br>[%] | Height<br>[%] | W05<br>[min] | Compound Name |
|-------|----------------------|----------------|----------------|-------------|---------------|--------------|---------------|
| 1     | 8,070                | 114,480        | 5,611          | 100,0       | 100,0         | 0,30         |               |
| Total |                      | 114,480        | 5,611          | 100,0       | 100,0         |              |               |

#### 4. Optimization of the Maillard reaction

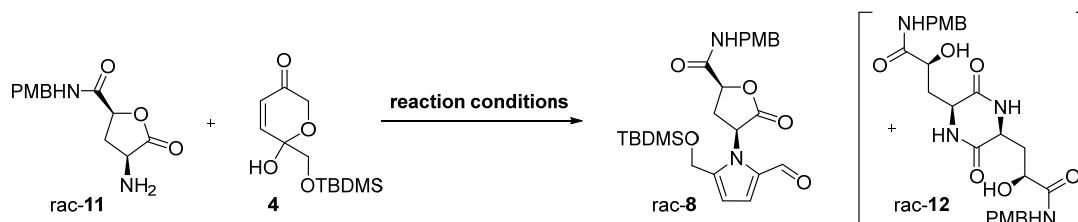

##### General procedure for $^1\text{H}$ -NMR experiment:

Reagents **rac-11** (9.0 mg, 0.034 mmol) and **4** (8.8 mg, 0.034 mmol, 1.0 equiv) were dissolved in the specified solvents (see the Table). The resulting reaction mixtures were stirred under the specified conditions for 14 h. After completion, the solvent was evaporated *in vacuo*. The reactions yields were determined by  $^1\text{H}$ -NMR with the internal standard 1,1,2-trichloroethane (4.5 mg, 0.034 mmol, 3  $\mu\text{l}$ , 1.0 equiv), in  $\text{CDCl}_3$ . In selected experiments (A, Q, R, Y, Z), yields of the by-product **rac-12** were determined by  $^1\text{H}$ -NMR in  $\text{DMSO-}d_6$ , with 1,1,2-trichloroethane as the internal standard.

| Experiment | A equiv                                | B equiv | Reaction conditions                                                                        | P<br>H-NMR –<br>Yield (CDCl <sub>3</sub> ) | BP<br>H-NMR –<br>Yield*(DMSO- <i>d</i> <sub>6</sub> ) |
|------------|----------------------------------------|---------|--------------------------------------------------------------------------------------------|--------------------------------------------|-------------------------------------------------------|
| A          | 1                                      | 1       | dry CH <sub>2</sub> Cl <sub>2</sub> (0.2M), Ar, rt, 14 h                                   | 33%                                        | 16%                                                   |
| B          | 1.1                                    | 1       | dry CH <sub>2</sub> Cl <sub>2</sub> (0.2M), Ar, rt, 14 h                                   | 37%                                        | -                                                     |
| C          | 1                                      | 1       | dry CH <sub>2</sub> Cl <sub>2</sub> (0.2M), Ar, 35 °C, 14 h                                | 41%                                        | -                                                     |
| D          | 1                                      | 1       | CH <sub>2</sub> Cl <sub>2</sub> (0.2M), rt, 14 h                                           | 36%                                        | -                                                     |
| E          | 1                                      | 1       | TEA (1 equiv), dry CH <sub>2</sub> Cl <sub>2</sub> (0.2M), Ar, rt, 14 h                    | 0%                                         | -                                                     |
| F          | 1                                      | 1       | dry CH <sub>2</sub> Cl <sub>2</sub> (0.2M), MS (3A), Ar, rt, 14 h                          | 36%                                        | -                                                     |
| G          | 1                                      | 1       | dry CH <sub>2</sub> Cl <sub>2</sub> (0.2M), Na <sub>2</sub> SO <sub>4</sub> , Ar, rt, 14 h | 35%                                        | -                                                     |
| H          | 1                                      | 1       | DCE (0.2M), Ar, 55 °C, 14 h                                                                | 43%                                        | -                                                     |
| I          | 1                                      | 1       | THF/H <sub>2</sub> O (0.2M), 55 °C, 14 h                                                   | 20%                                        | -                                                     |
| J          | 1                                      | 1       | CH <sub>2</sub> Cl <sub>2</sub> (0.2M), AcOH (cat.), rt, 14 h                              | 32%                                        | -                                                     |
| K          | 1                                      | 1       | THF/H <sub>2</sub> O (0.2M), rt, 14 h                                                      | 21%                                        | -                                                     |
| L          | 1                                      | 1       | THF/H <sub>2</sub> O (0.2M), AcOH (cat.), rt, 14 h                                         | 19%                                        | -                                                     |
| M          | 1                                      | 1       | dry MeCN (0.2 M), Ar, rt, 14 h                                                             | 23%                                        | -                                                     |
| N          | 1                                      | 1       | dry MeCN (0.2 M), Ar, 60 °C, 14 h                                                          | 30%                                        | -                                                     |
| O          | 1                                      | 1       | dry THF (0.2 M), Ar, rt, 14 h                                                              | 17%                                        | -                                                     |
| P          | 1                                      | 1       | dry THF (0.2 M), Ar, 60 °C, 14 h                                                           | 22%                                        | -                                                     |
| Q          | 1                                      | 1       | dry toluene (0.2M), Ar, rt, 14 h                                                           | 36%                                        | 25%                                                   |
| R          | 1                                      | 1       | dry toluene (0.2M), Ar, 70 °C, 14 h                                                        | 47%                                        | 23%                                                   |
| S          | 1                                      | 1       | dry toluene (0.2M), Ar, 90 °C, 14 h                                                        | 47%                                        | -                                                     |
| T          | 1                                      | 1       | dry toluene (0.2M), Ar, 105 °C, 14 h                                                       | 37%                                        | -                                                     |
| U          | 1                                      | 1       | DCE (0.2M), pTsOH (0.88 eq), Ar, rt, 14 h                                                  | 37%                                        | -                                                     |
| V          | 1                                      | 1       | DCE (0.2M), pTsOH (0.75 eq), 55°C, 14 h                                                    | 23%                                        | -                                                     |
| X          | 1 (gradual<br>addition over<br>30 min) | 1       | dry CH <sub>2</sub> Cl <sub>2</sub> (0.08M), Ar, 35°C, 14 h                                | 42%                                        | -                                                     |
| Y          | 1                                      | 1       | dry CH <sub>2</sub> Cl <sub>2</sub> (0.02 M), rt, 14 h                                     | 30%                                        | 35%                                                   |
| Z          | 1                                      | 2       | dry CH <sub>2</sub> Cl <sub>2</sub> (0.02 M), rt, 14 h                                     | 37%                                        | 30%                                                   |

\* yields with respect to the reaction stoichiometry rac-**11**/rac-**12** 2:1



## 5. X-ray analysis of compounds (*S,S*)-1

Single-crystal diffraction data for (*S,S*)-1 were collected on a Bruker D8 VENTURE Kappa Duo diffractometer equipped with a PHOTON III detector and two I $\mu$ S microfocus sealed tubes (Cu, Mo). Data were collected at 120K using monochromated CuK $\alpha$  ( $\lambda = 1.54178$  Å) primary radiation. Data reduction was carried out using the diffractometer software. The phase problem was solved by intrinsic phasing (SHELXT)<sup>4</sup> and the structural model was refined by full-matrix least-squares against  $F^2$  (SHELXL).<sup>5</sup> Non-hydrogen atoms were refined anisotropically and with no constraints imposed. Hydrogen atoms were refined isotropically. The two hydrogen atoms attached to N1 were refined freely, while all other hydrogen atoms were put into idealized positions and were refined using the riding model.

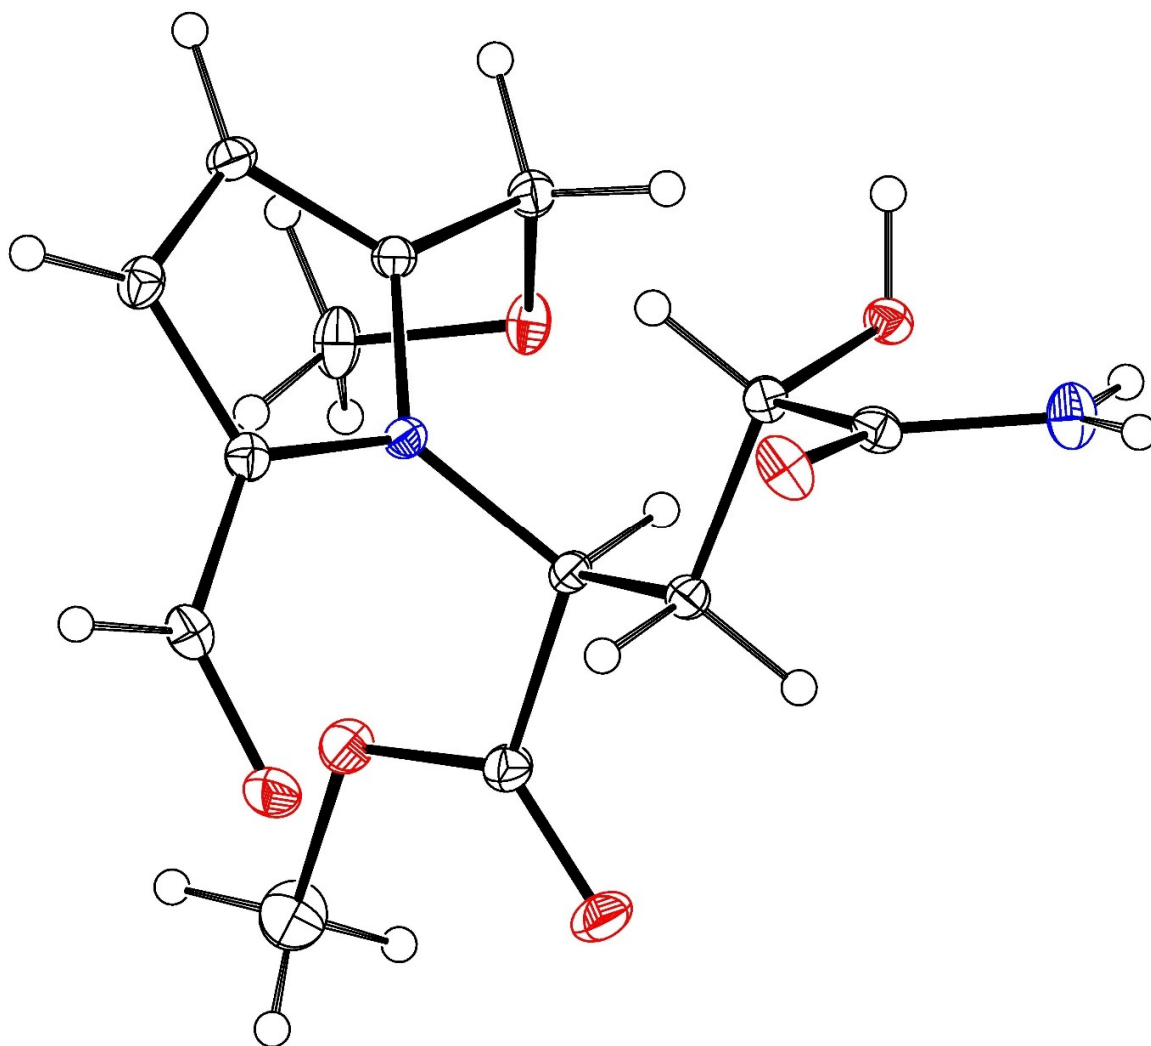

The molecular structure of (*S,S*)-1 in solid state. Non-hydrogen atoms are displayed by thermal ellipsoids on 30% probability level.

PROTON\_01  
 1H NMR, 400 MHz, AutoX\_DB  
 pincekova\_0433\_LP311  
 DMSO  
 01 Feb 2023

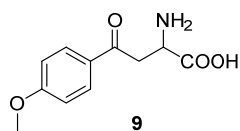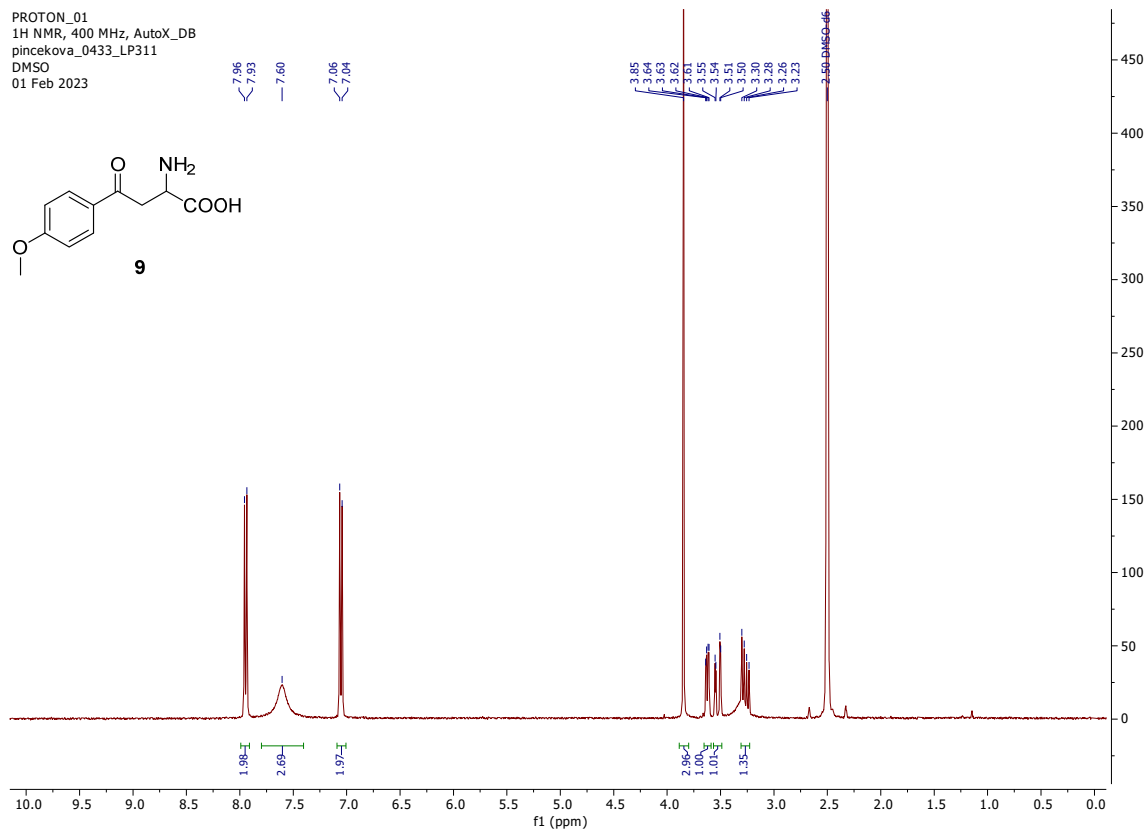

CARBON\_01  
 13C NMR, 100 MHz, AutoX\_DB  
 pincekova\_4446\_LP311  
 DMSO  
 01 Dec 2022

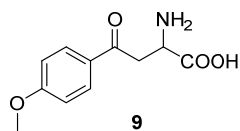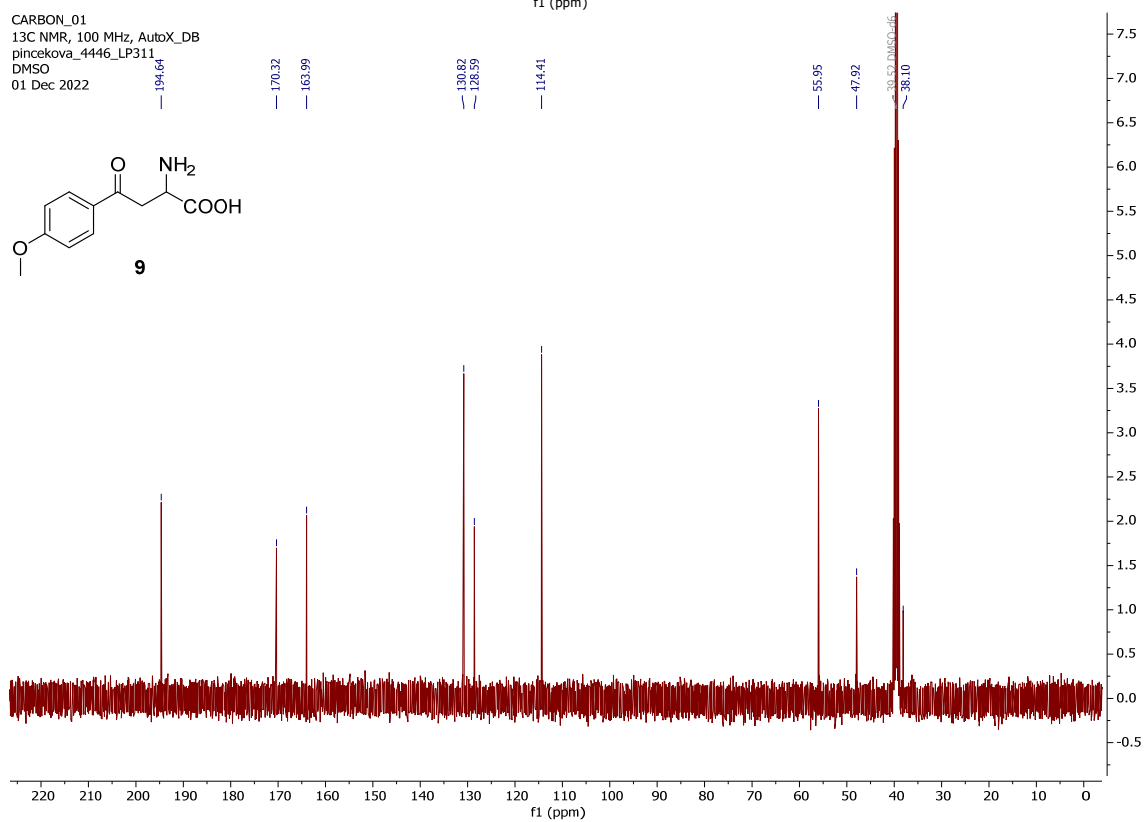

pincekova\_1437\_LP277.1.1.1r  
 Bruker 400 MHz  
 pincekova\_1437\_LP277  
 CDCl<sub>3</sub>  
 20 Apr 2022

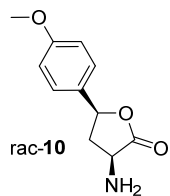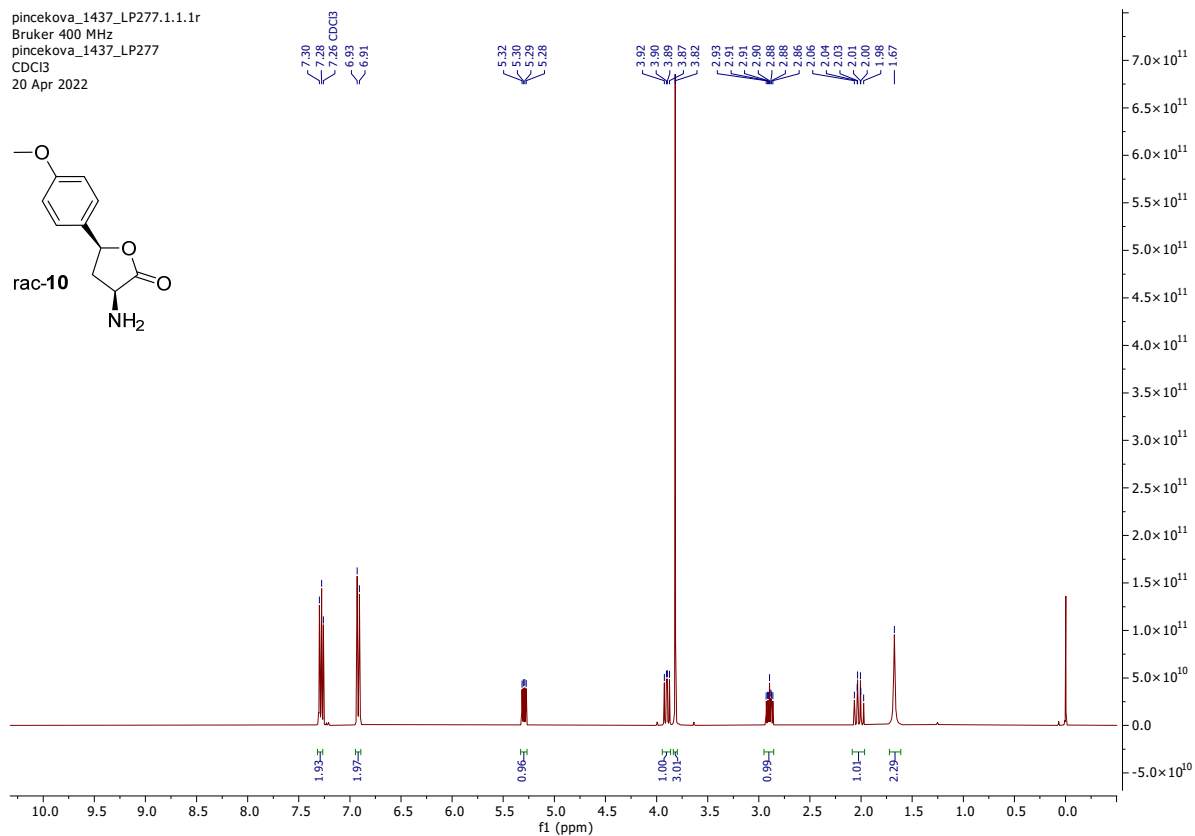

<sup>13</sup>C pincekova\_3084\_LP277 lactone NH2.2.1.1r  
 Bruker 100 MHz  
 pincekova\_3084\_LP277  
 DMSO  
 17 Aug 2022

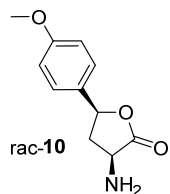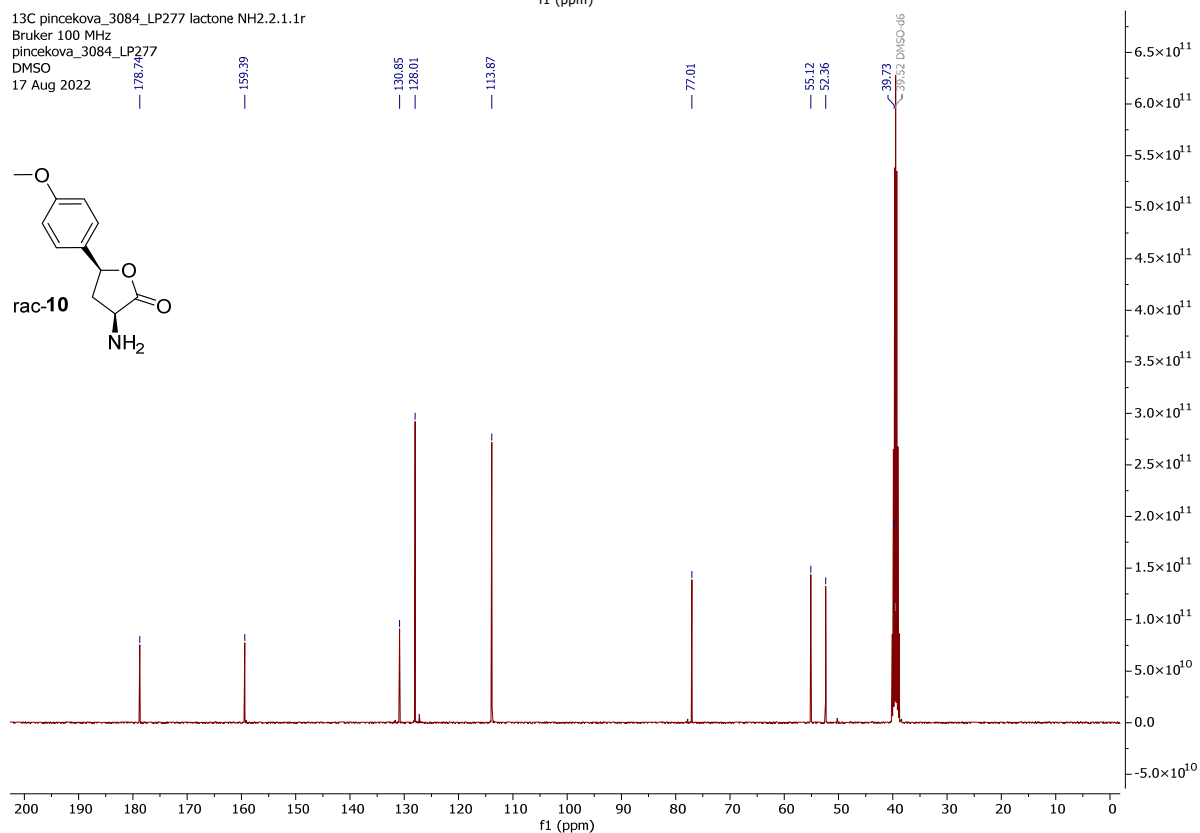

COc1ccc(cc1)[C@H]2O[C@@H](C(=O)O[C@H]2NC(=O)OC(C)(C)C)C(=O)O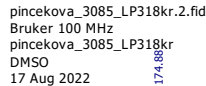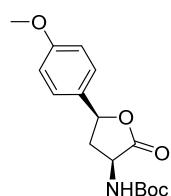

PROTON\_01  
 1H NMR, 400 MHz, AutoX\_ID  
 pincekova\_2993 LP287kr  
 DMSO-d6  
 10 Aug 2022

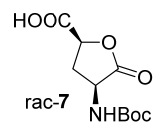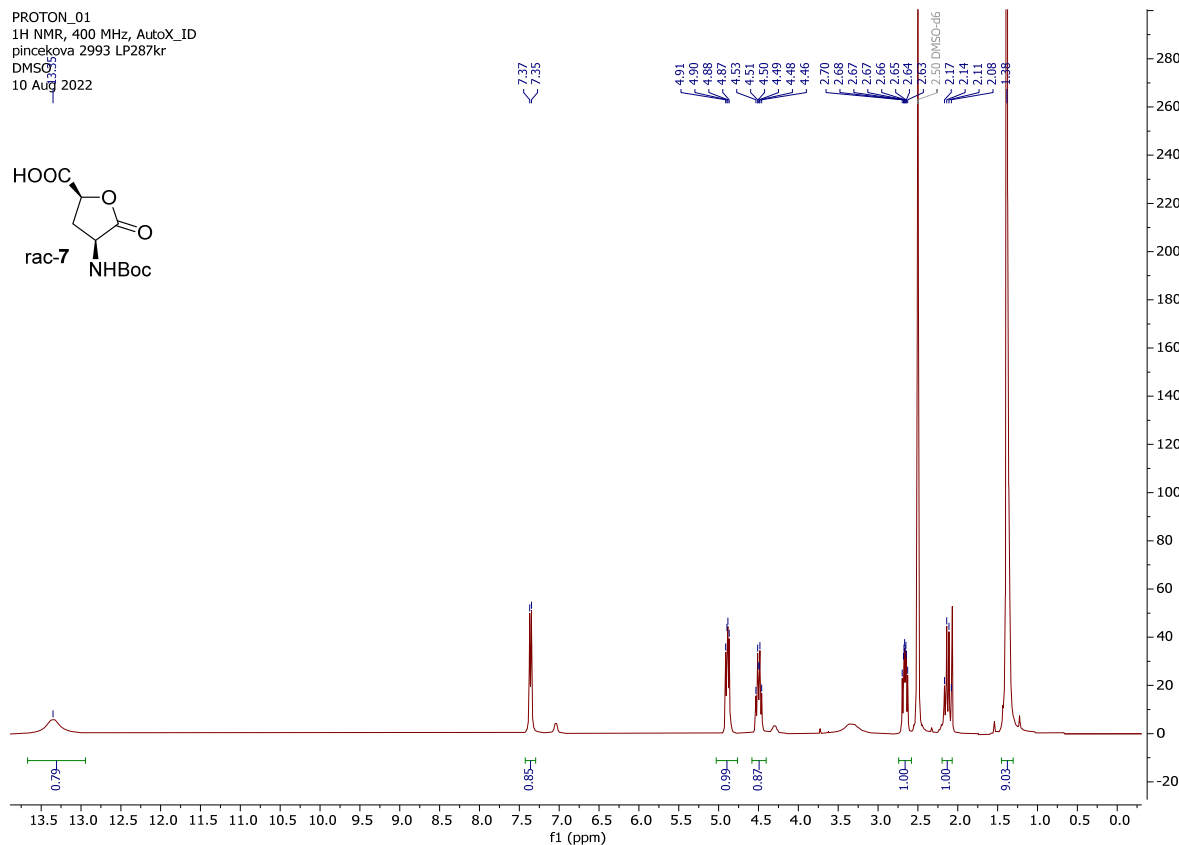

pincekova\_3086\_LP287kr.2.fid  
 Bruker 100 MHz  
 pincekova\_3086\_LP287kr  
 DMSO  
 17 Aug 2022

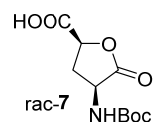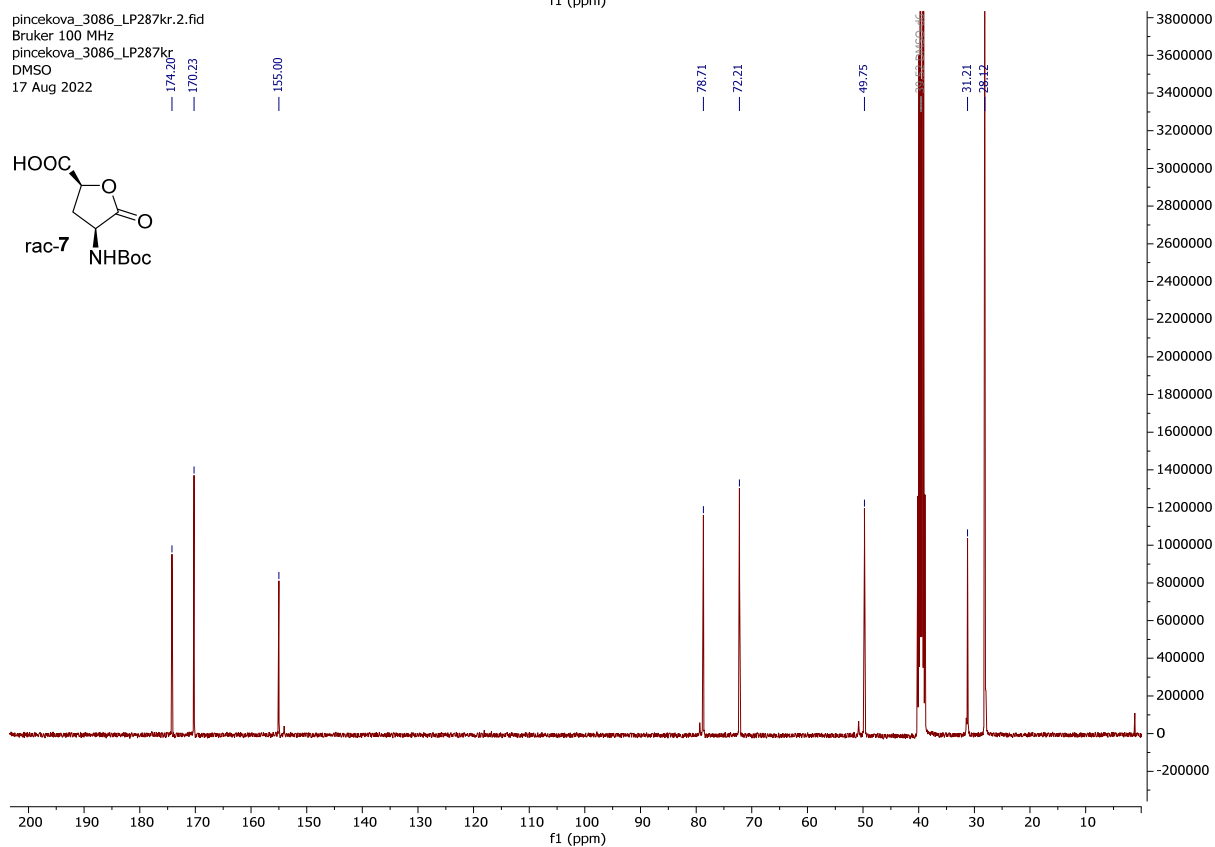

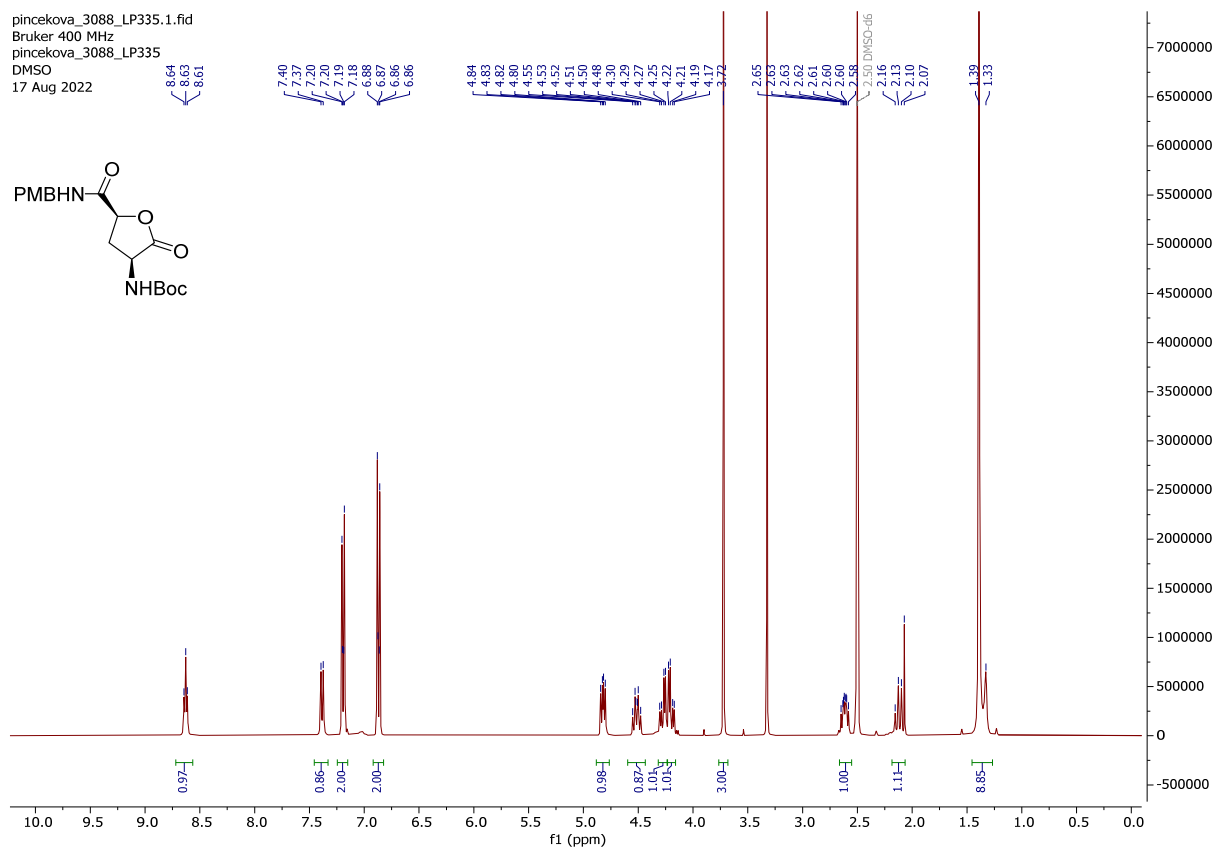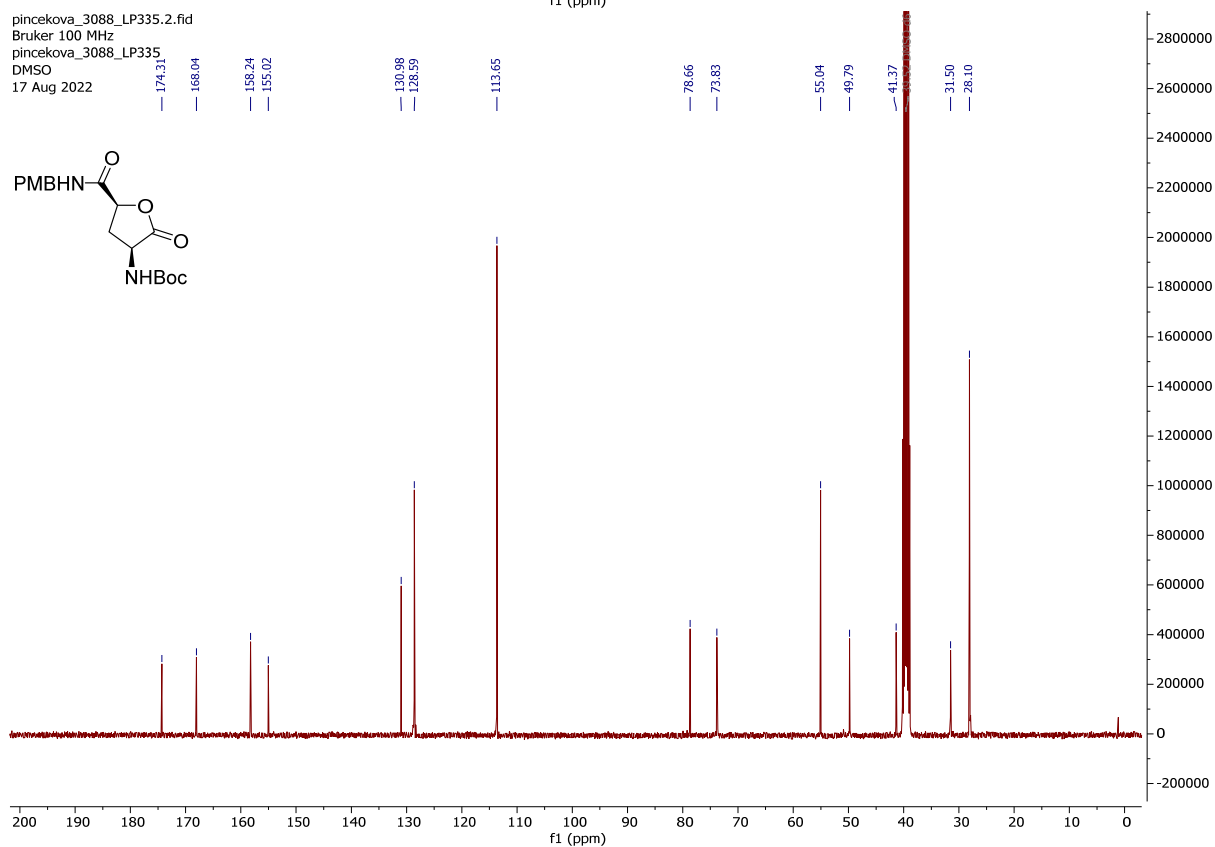

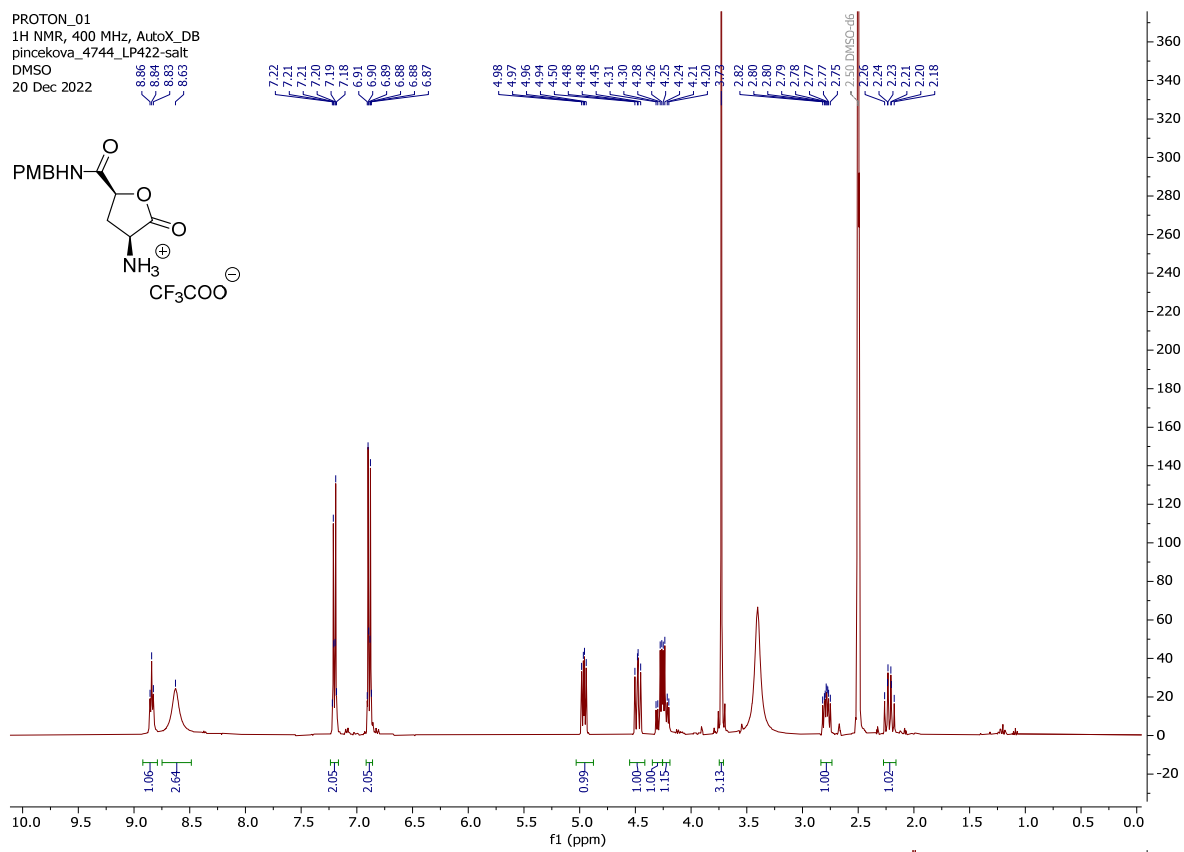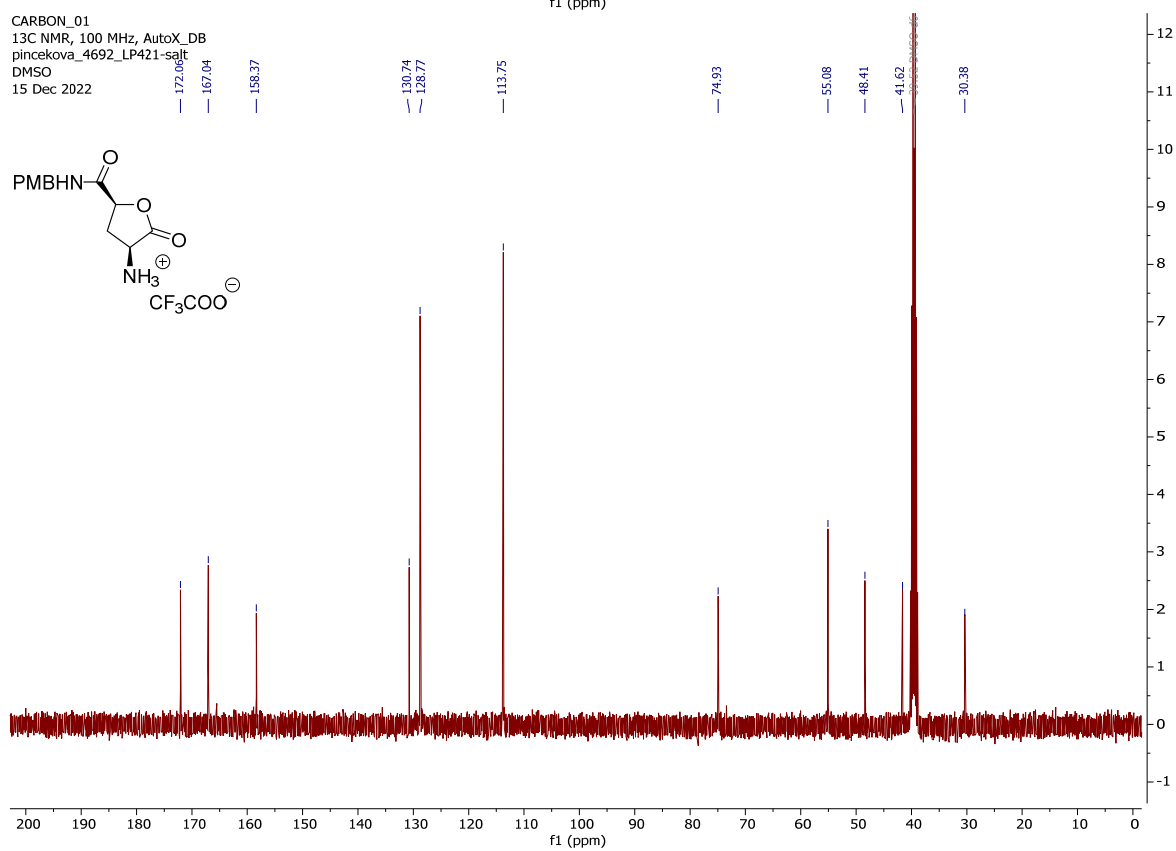

PROTON\_01  
 1H NMR, 400 MHz, AutoX\_ID  
 pincekova 2996 LP339  
 DMSO  
 10 Aug 2022

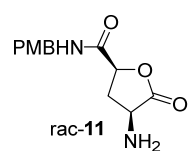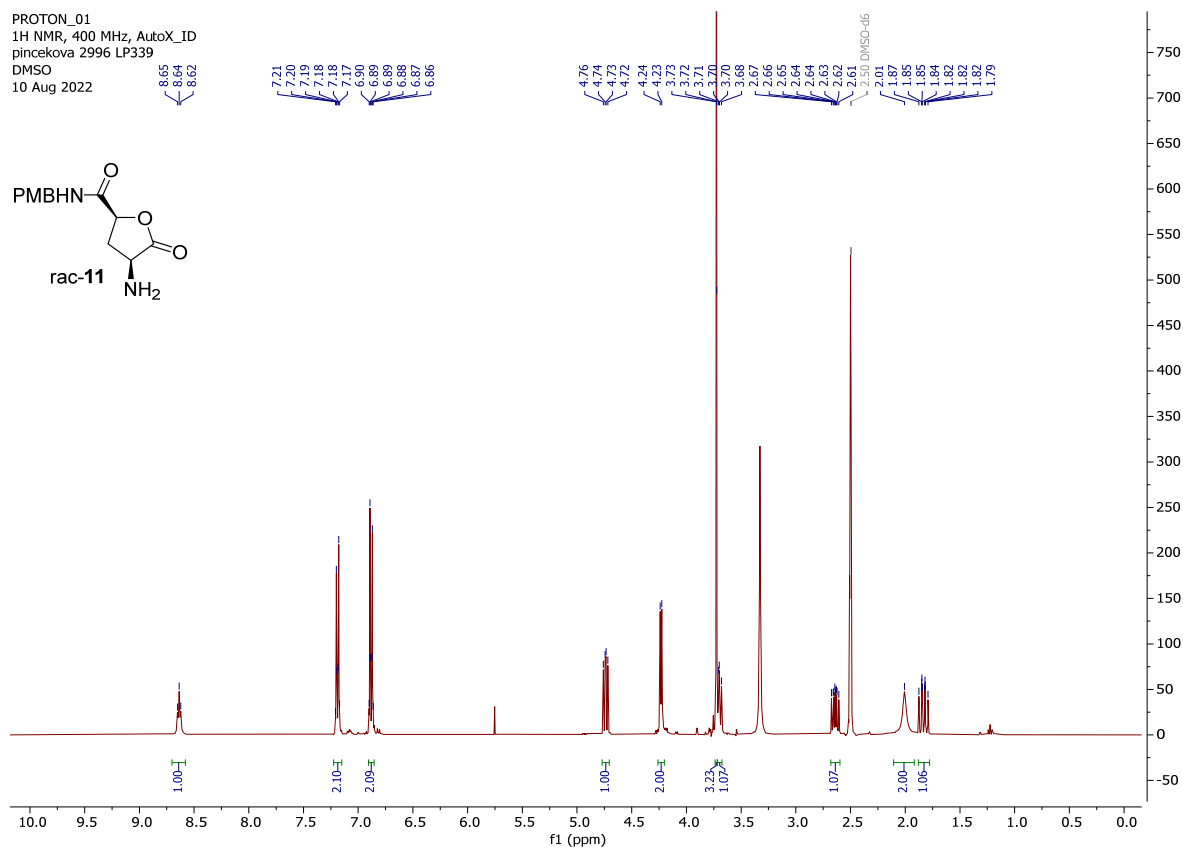

pincekova\_3087\_LP339.2.fid  
 Bruker 100 MHz  
 pincekova\_3087\_LP339  
 DMSO  
 17 Aug 2022

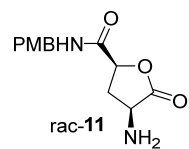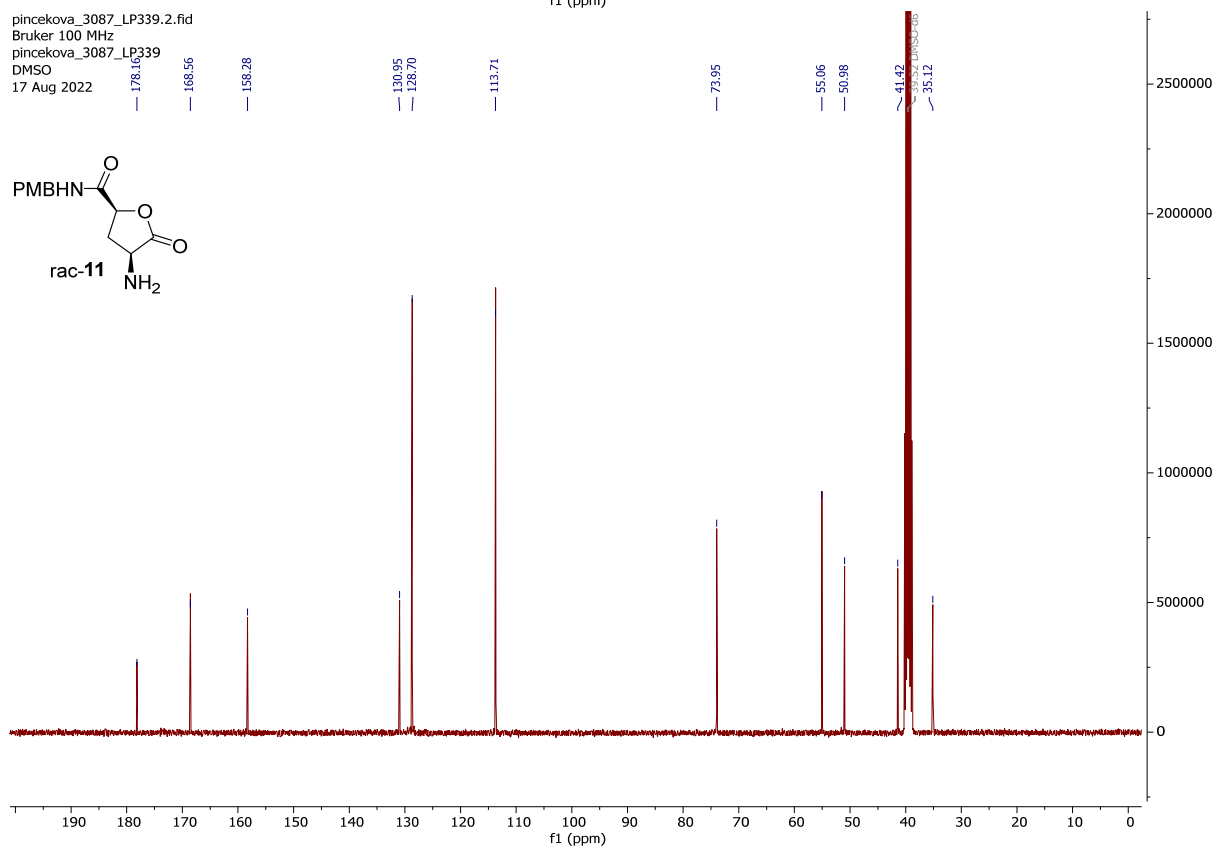



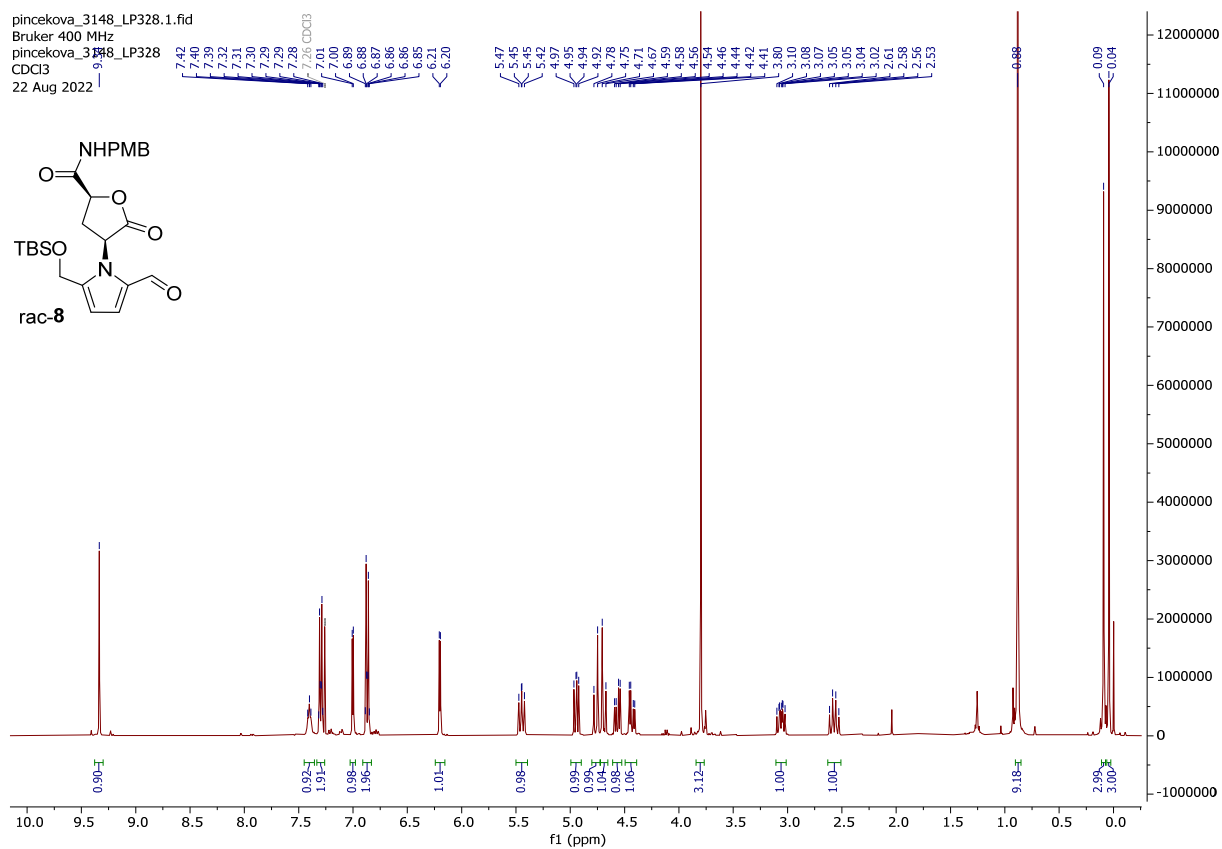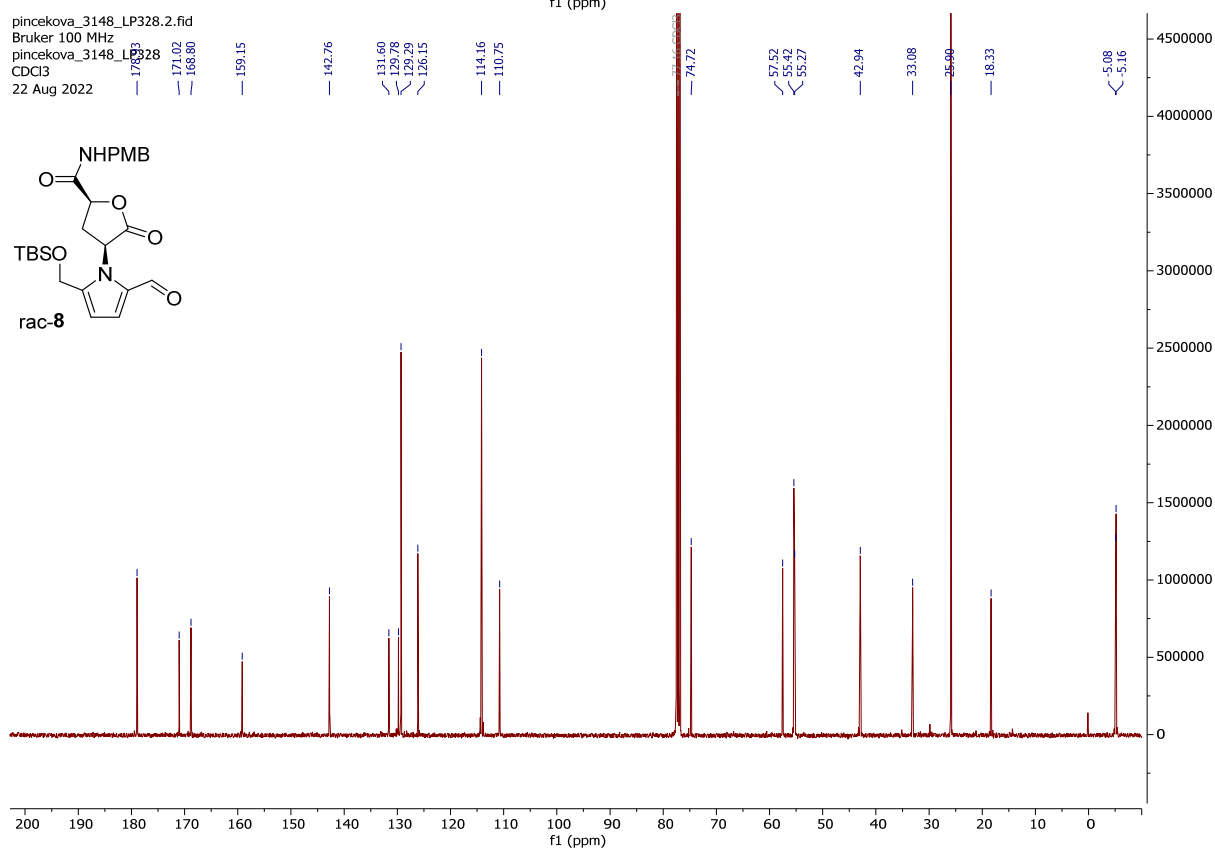

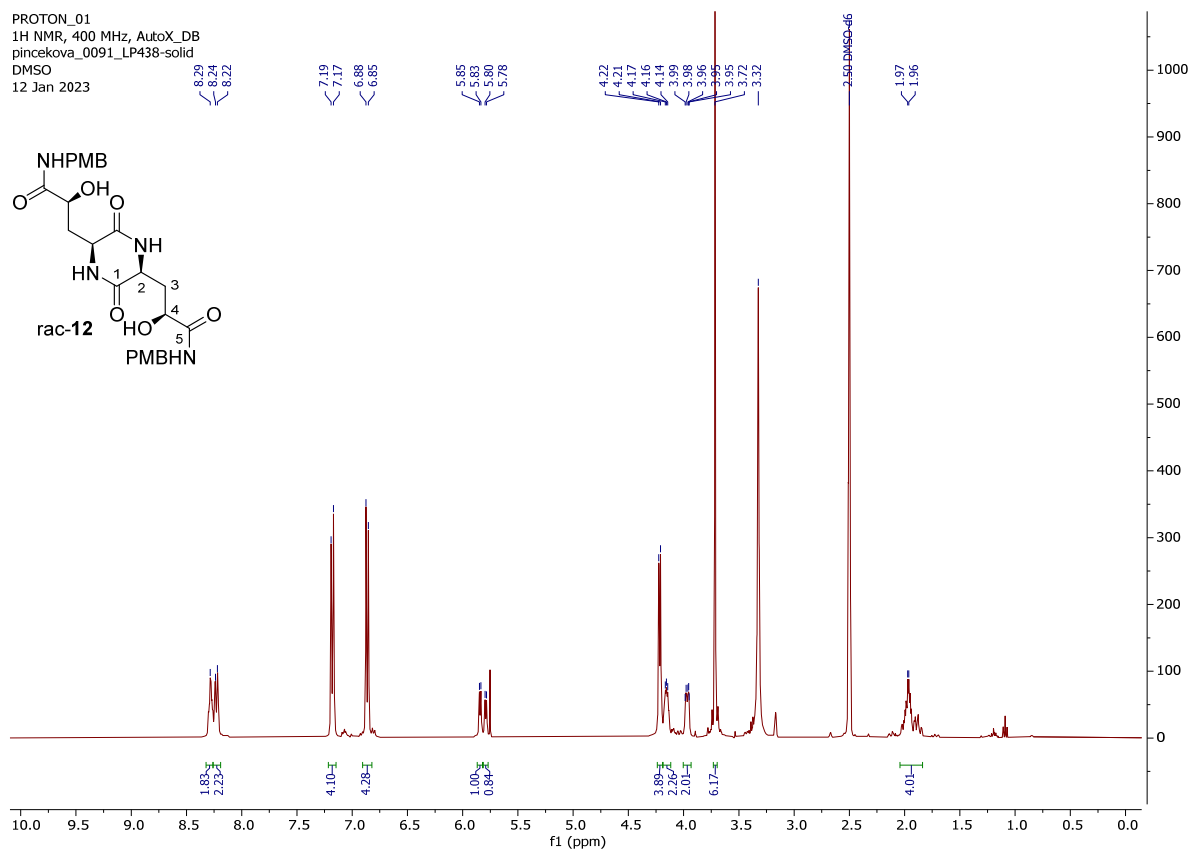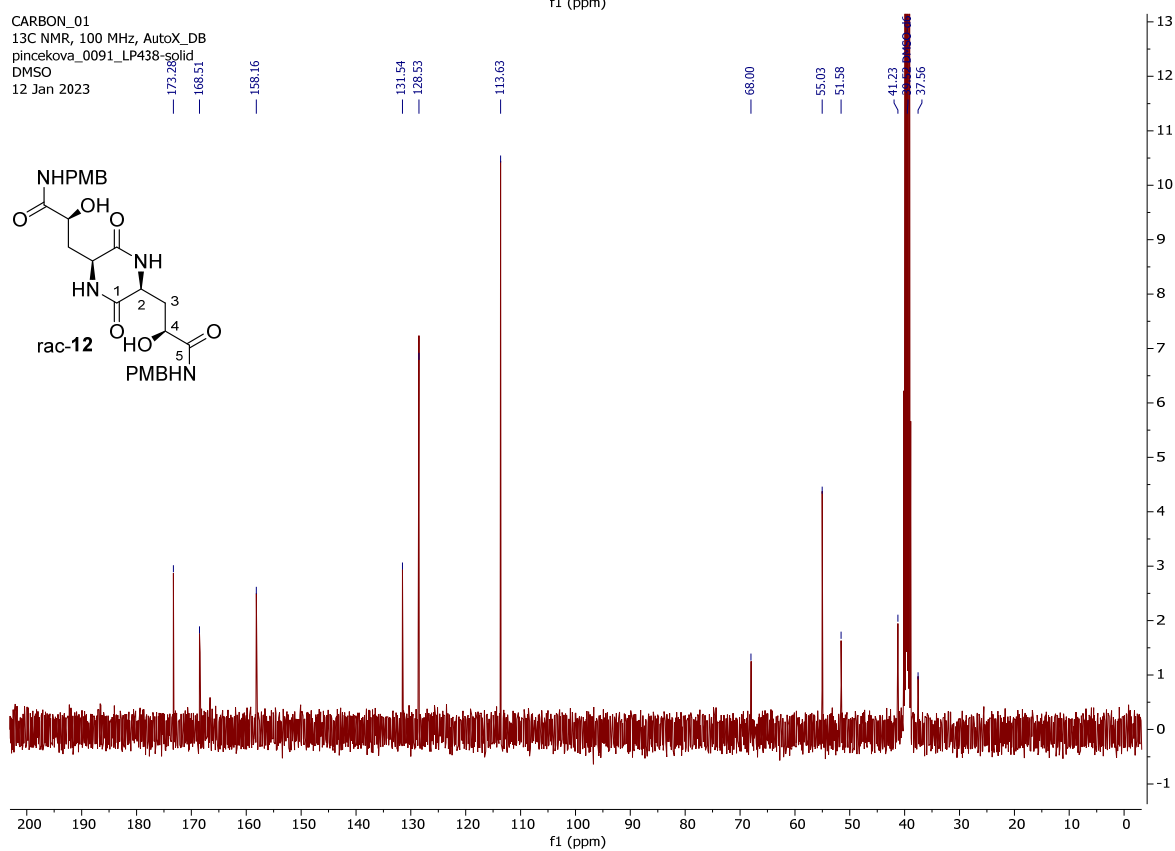

PROTON\_01  
 1H NMR, 400 MHz, AutoX\_DB  
 pinckova\_4532\_LP410  
 CDCl3  
 07 Dec 2022

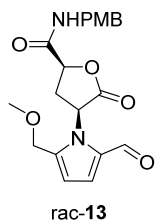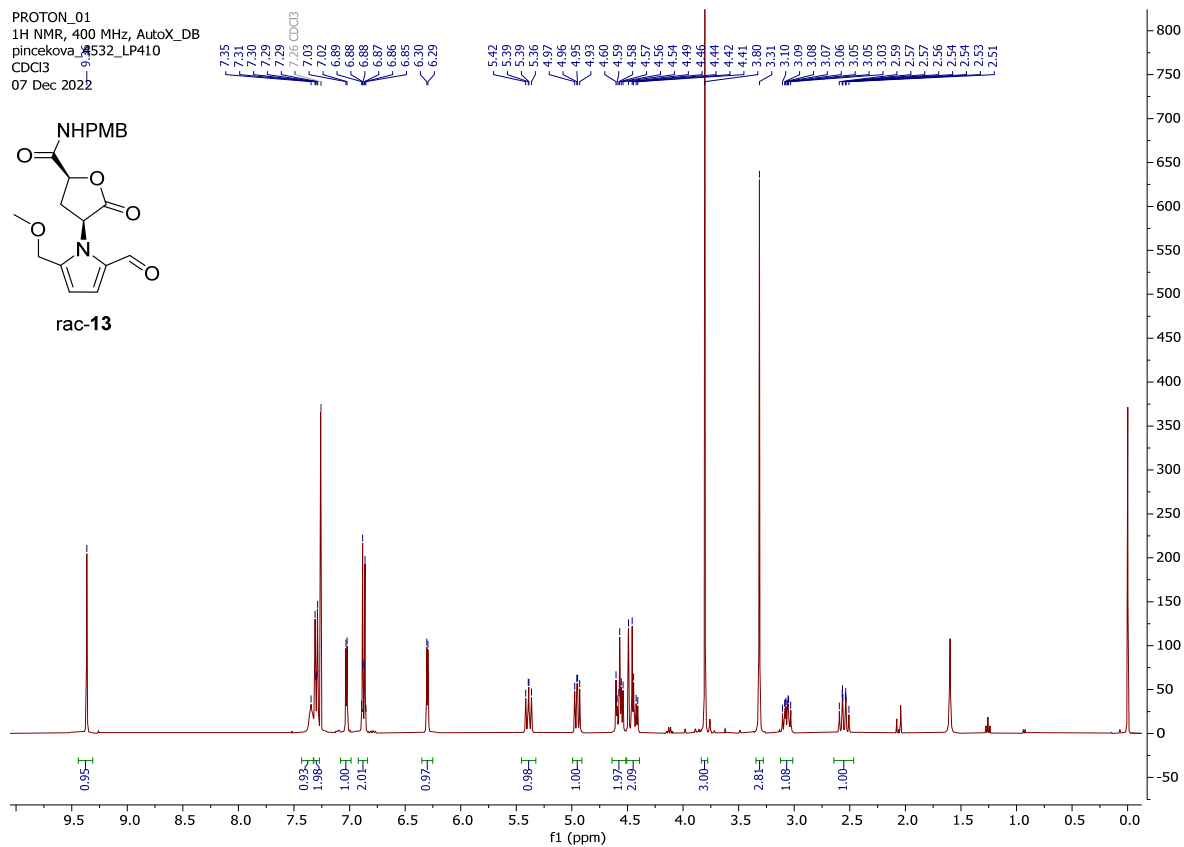

CARBON\_01  
 13C NMR, 100 MHz, AutoX\_DB  
 pinckova\_4142\_LP380  
 CDCl3  
 11 Nov 2022

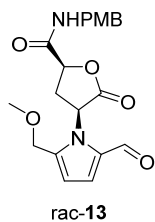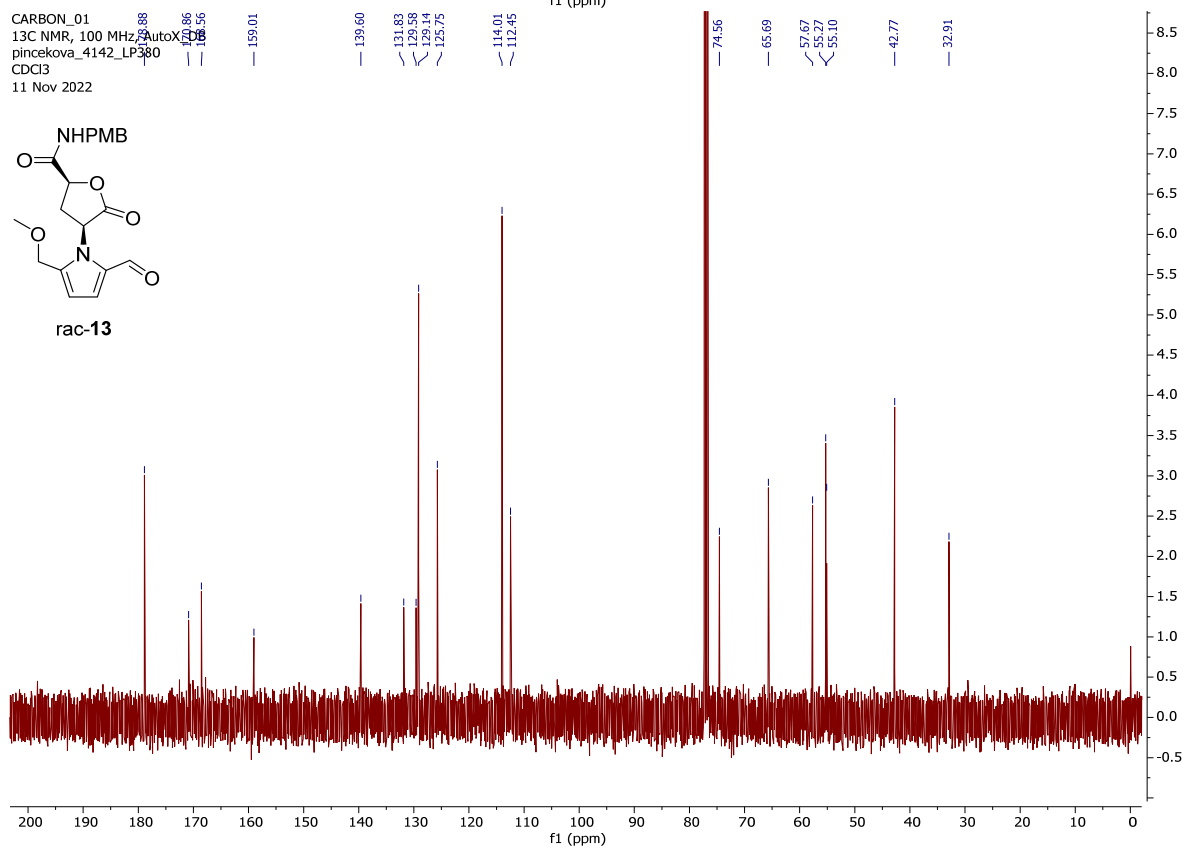

PROTON\_01  
 1H NMR, 400 MHz, AutoX\_DB  
 pincekova\_4637\_LP418  
 DMSO  
 13 Dec 2022

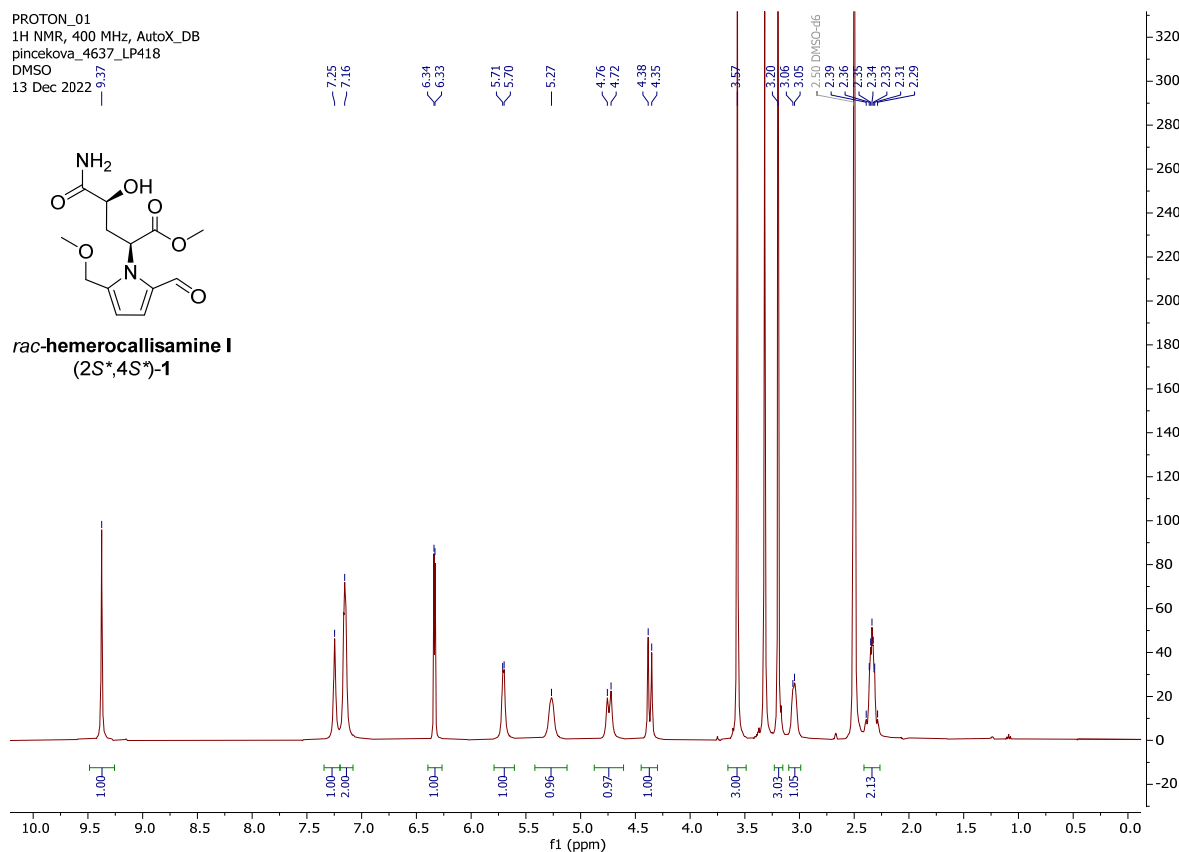

pincekova\_4653\_LP416  
 Bruker 400 MHz  
 pincekova\_4653\_LP416  
 DMSO  
 14 Dec 2022

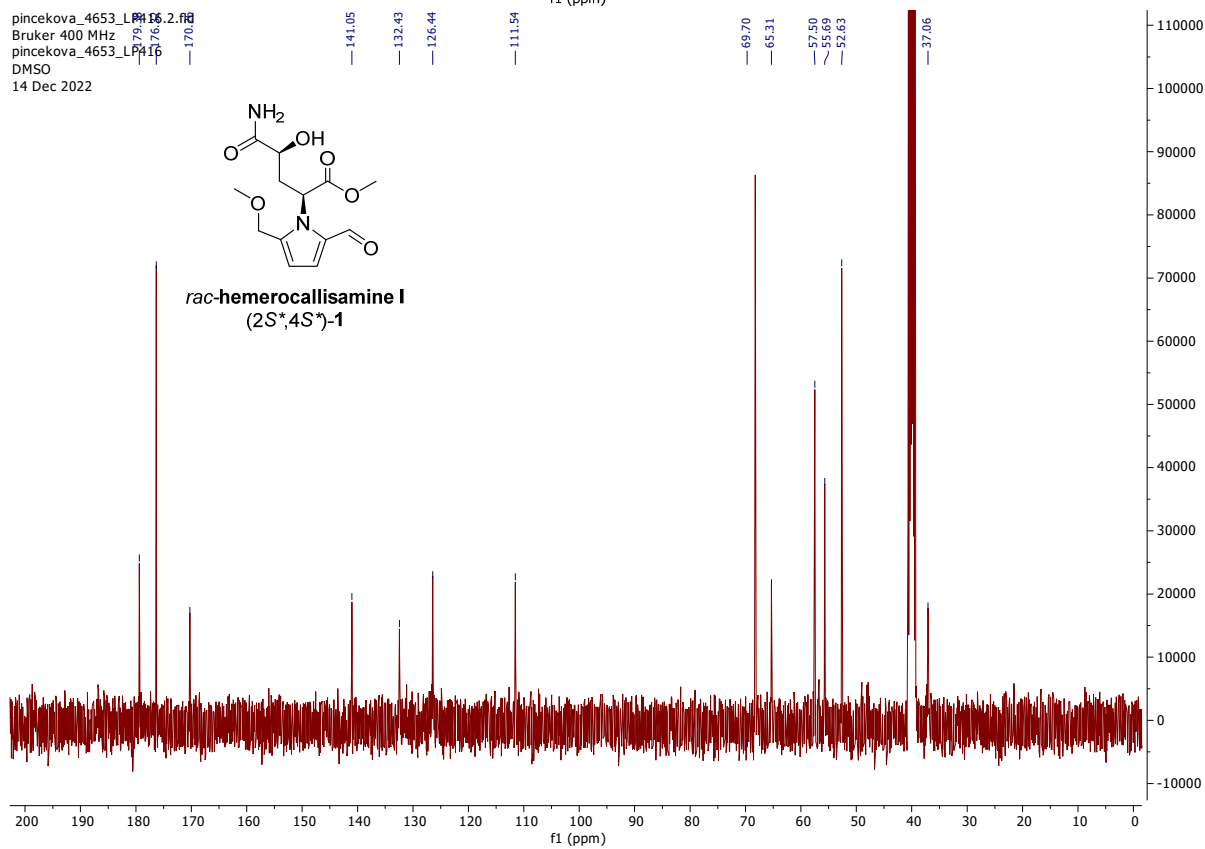

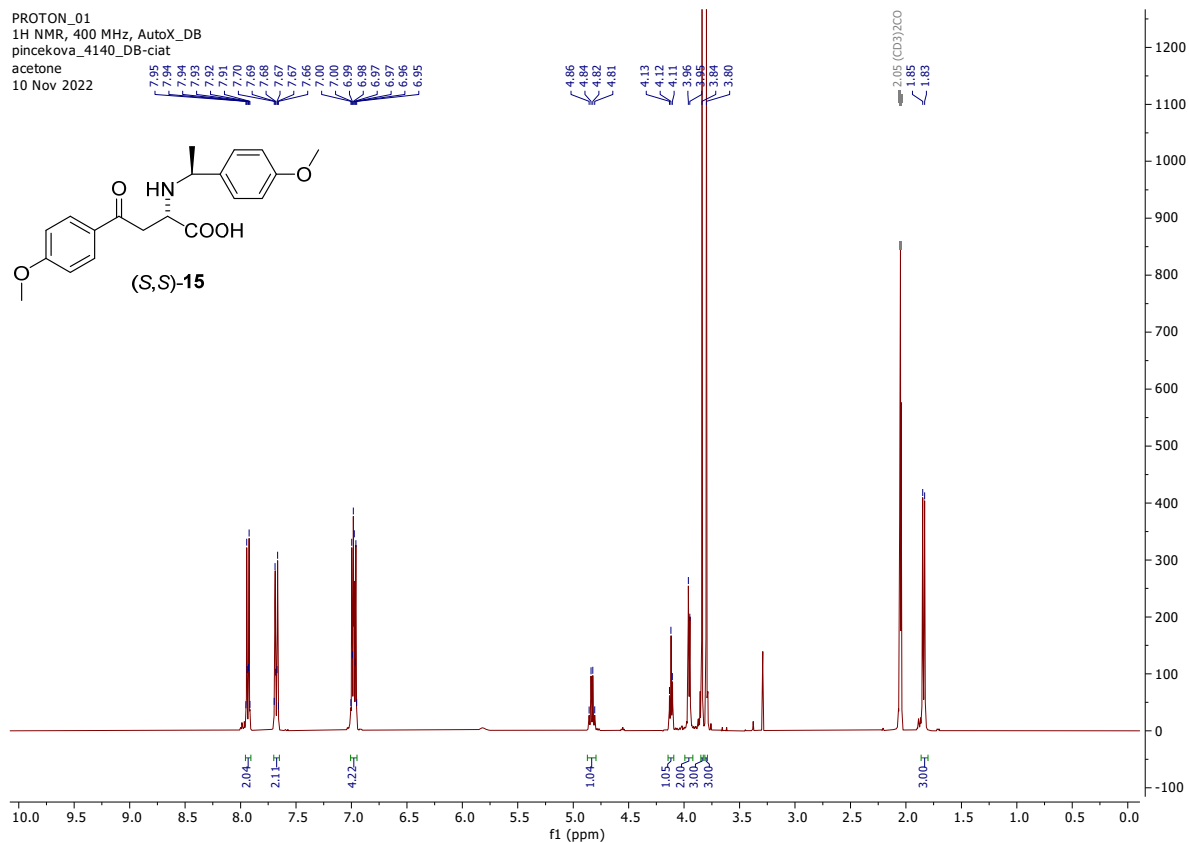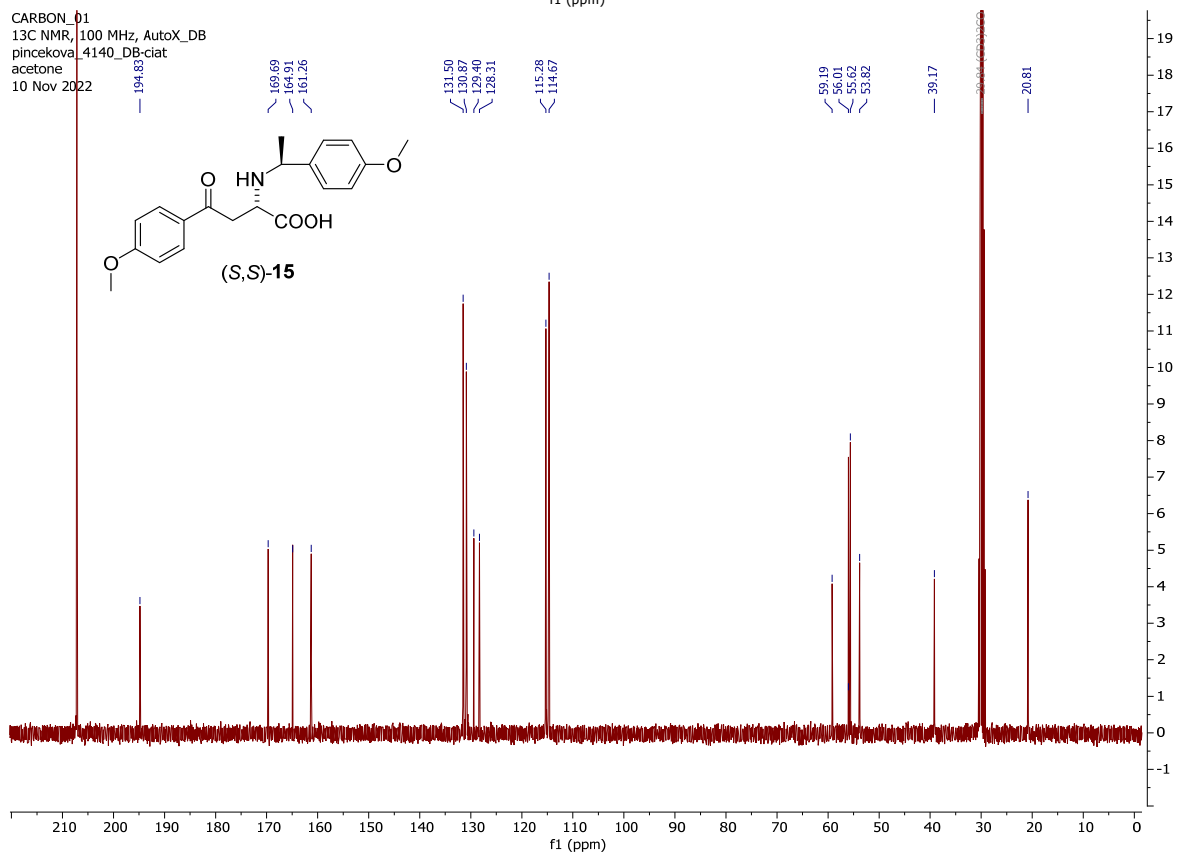

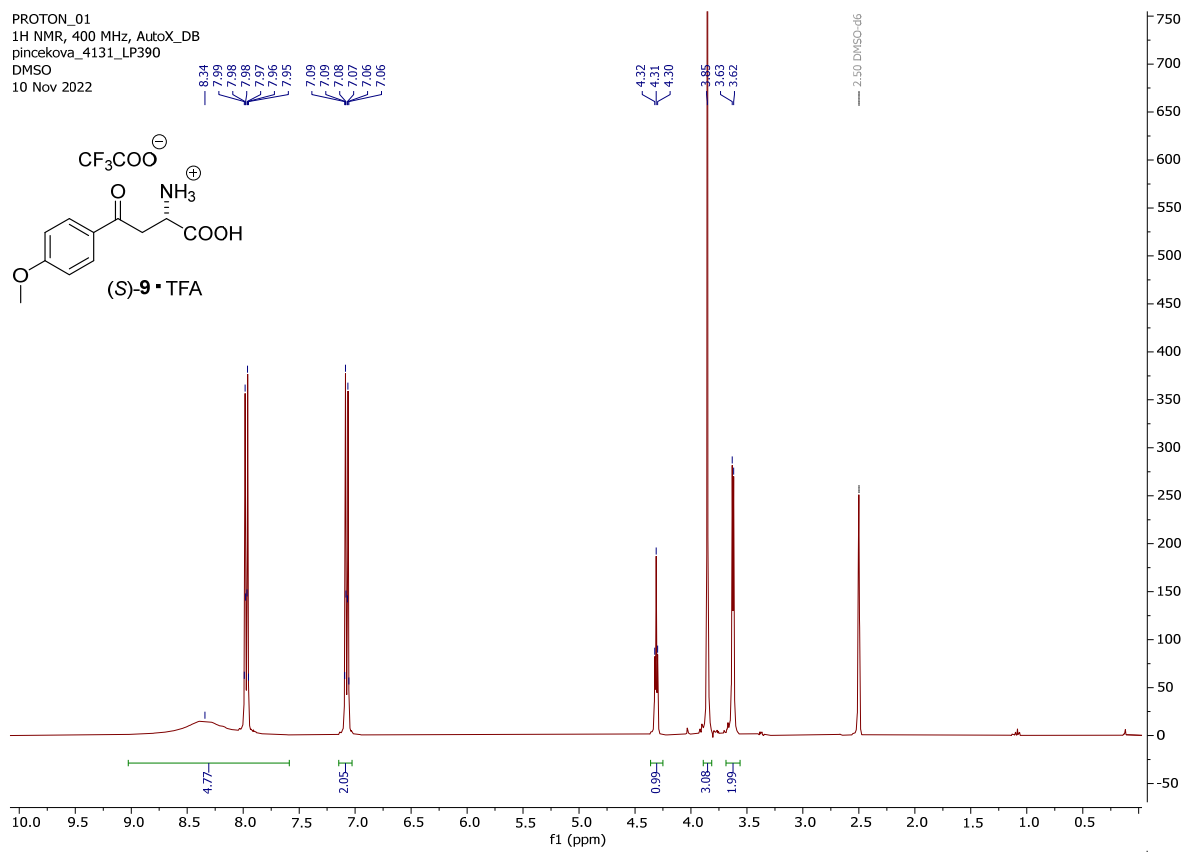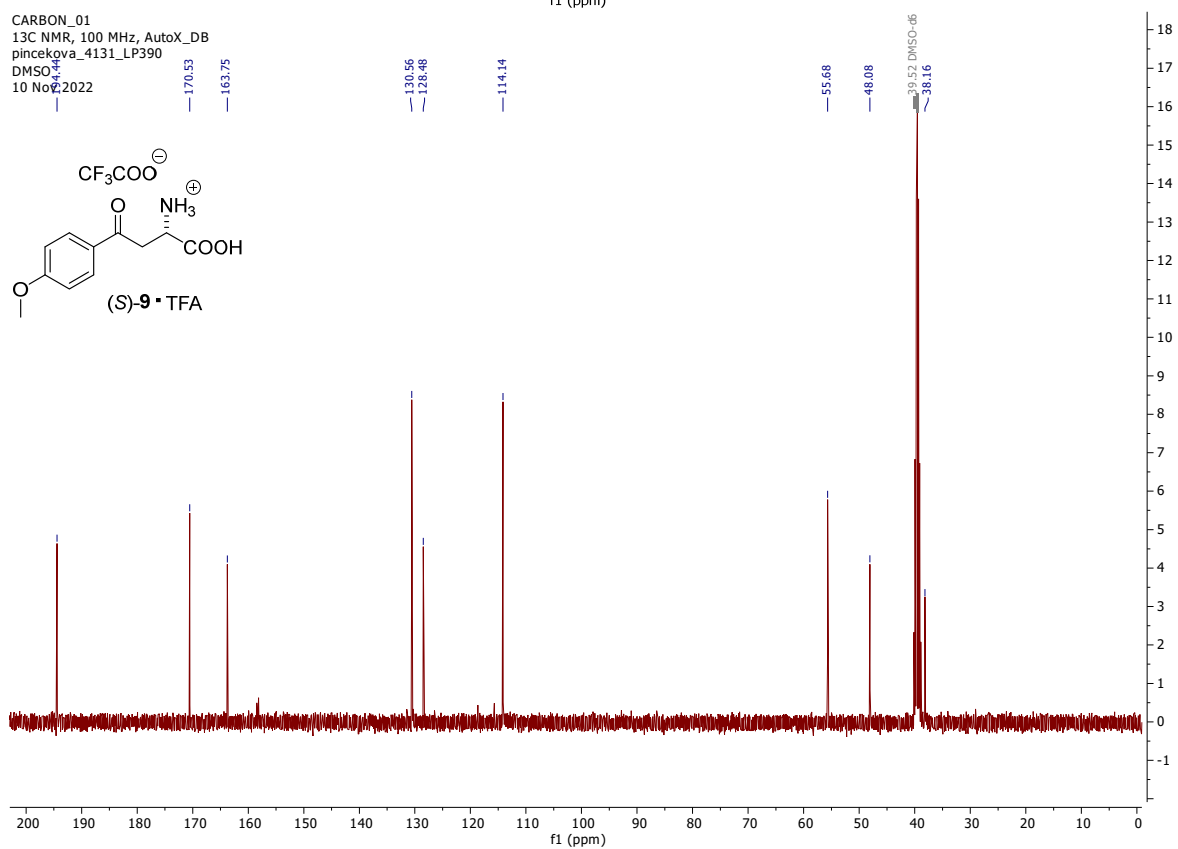

PROTON\_01  
 1H NMR, 400 MHz, AutoX\_DB  
 pincekova\_4271\_LP396  
 CDCl3  
 22 Nov 2022

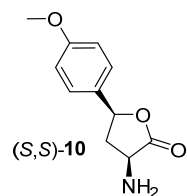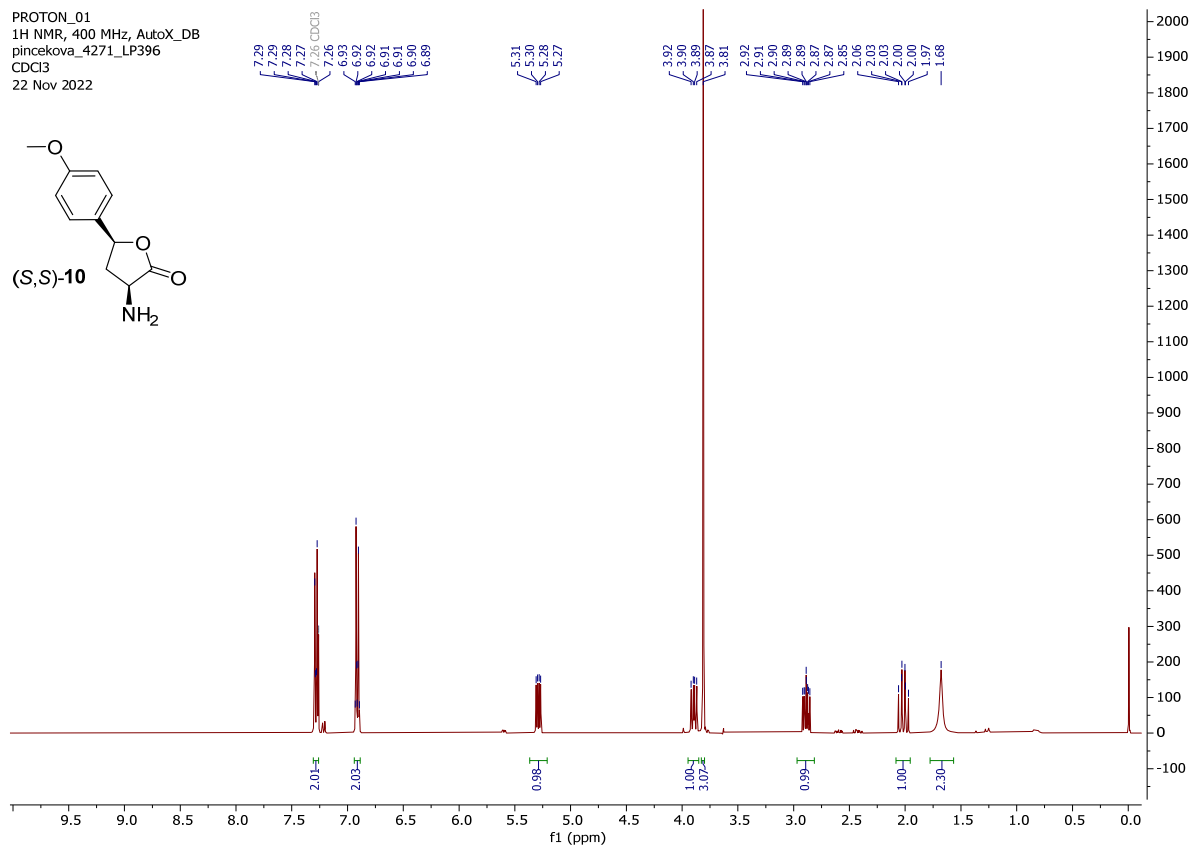

PROTON\_01  
 1H NMR, 400 MHz, AutoX\_DB  
 pincekova\_4132\_LP392  
 DMSO  
 10 Nov 2022

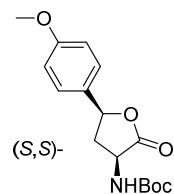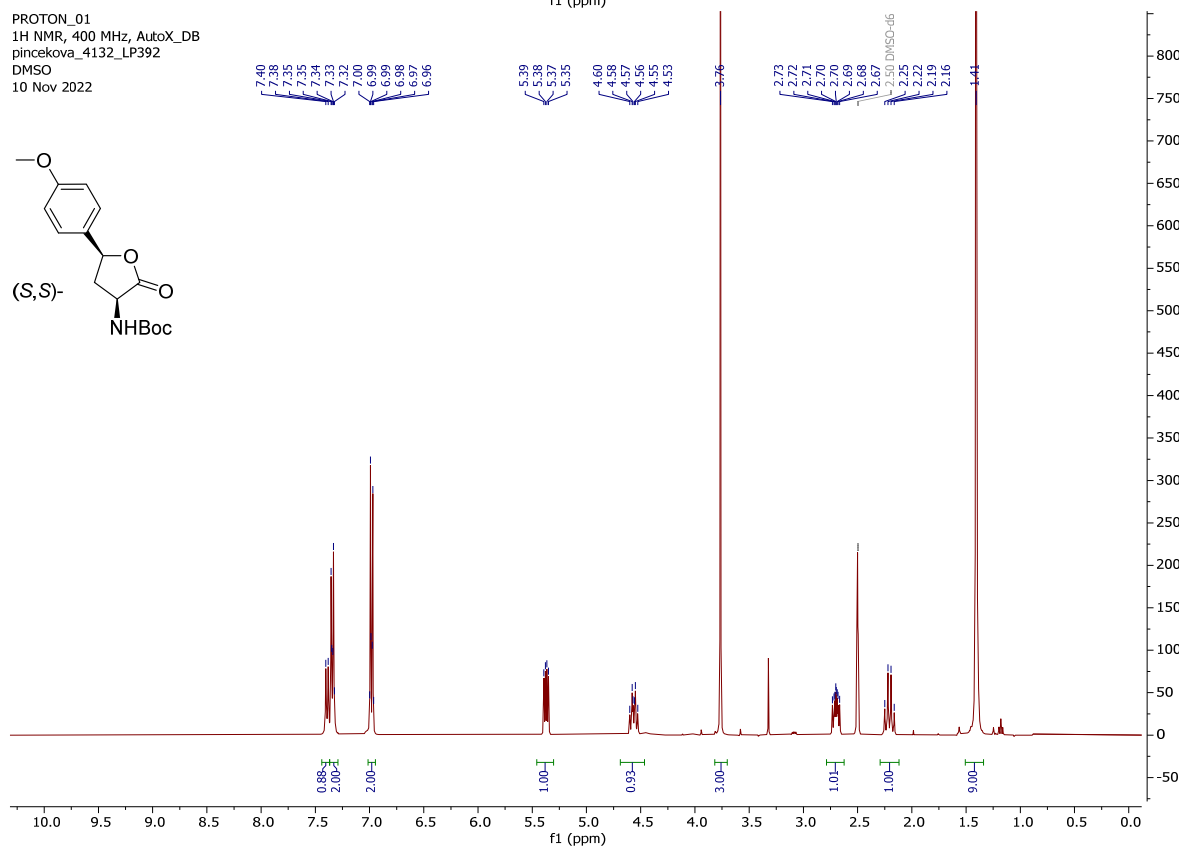

PROTON\_01  
 1H NMR, 400 MHz, AutoX\_DB  
 pincekova\_0119\_LP433  
 DMSO  
 13 Jan 2023

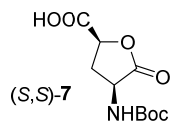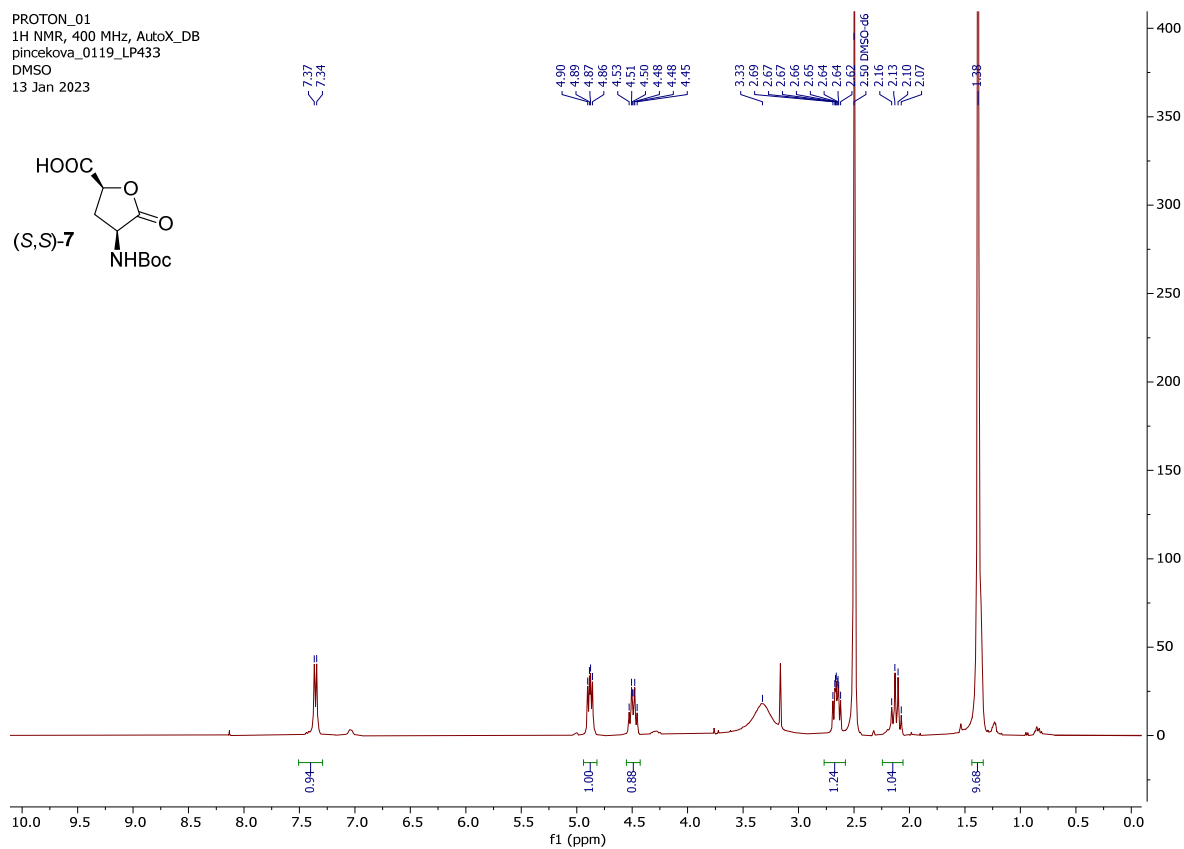

pincekova\_4657\_LP419.1.fid  
 Bruker 400 MHz  
 pincekova\_4657\_LP419  
 DMSO  
 14 Dec 2022

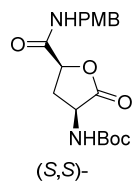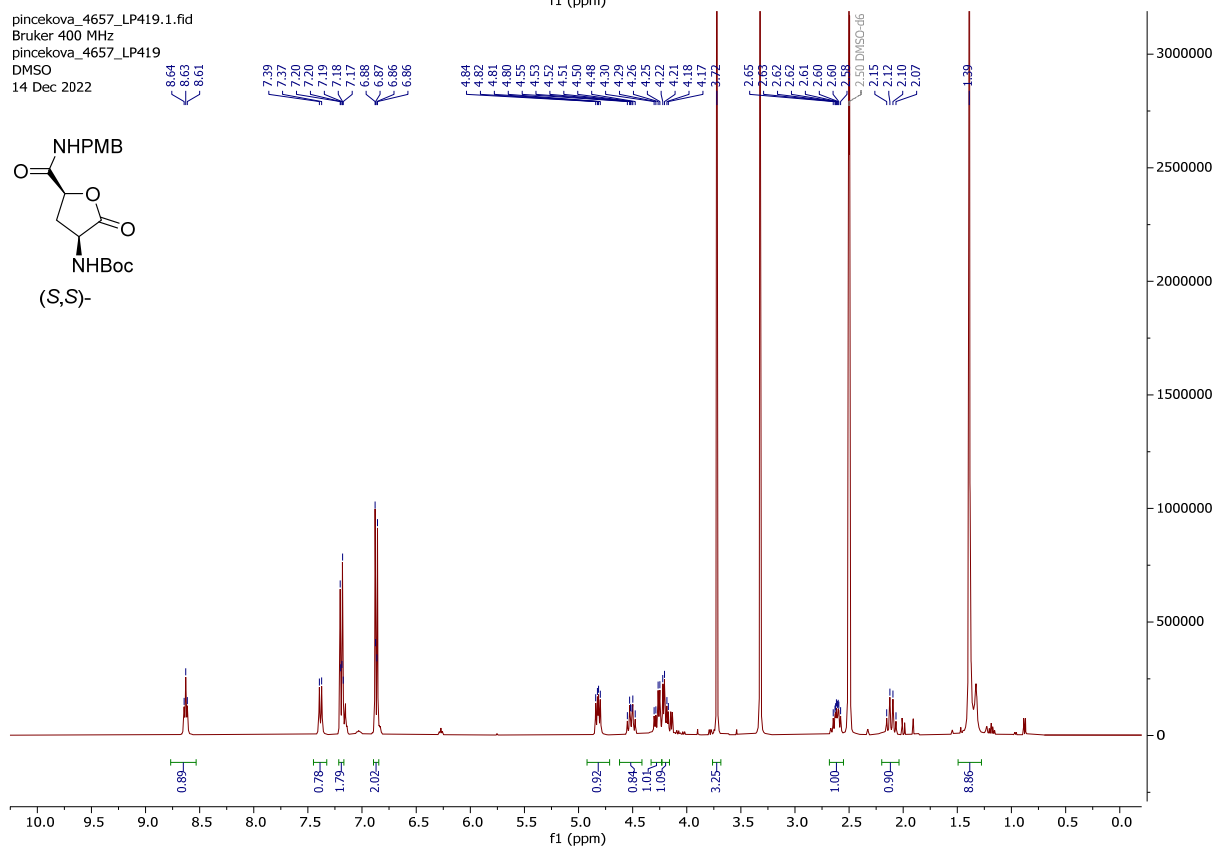



PROTON\_01  
 1H NMR, 400 MHz, AutoX\_DB  
 pincekova\_4583\_LP395  
 DMSO  
 09 Dec 2022

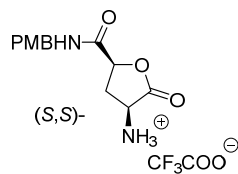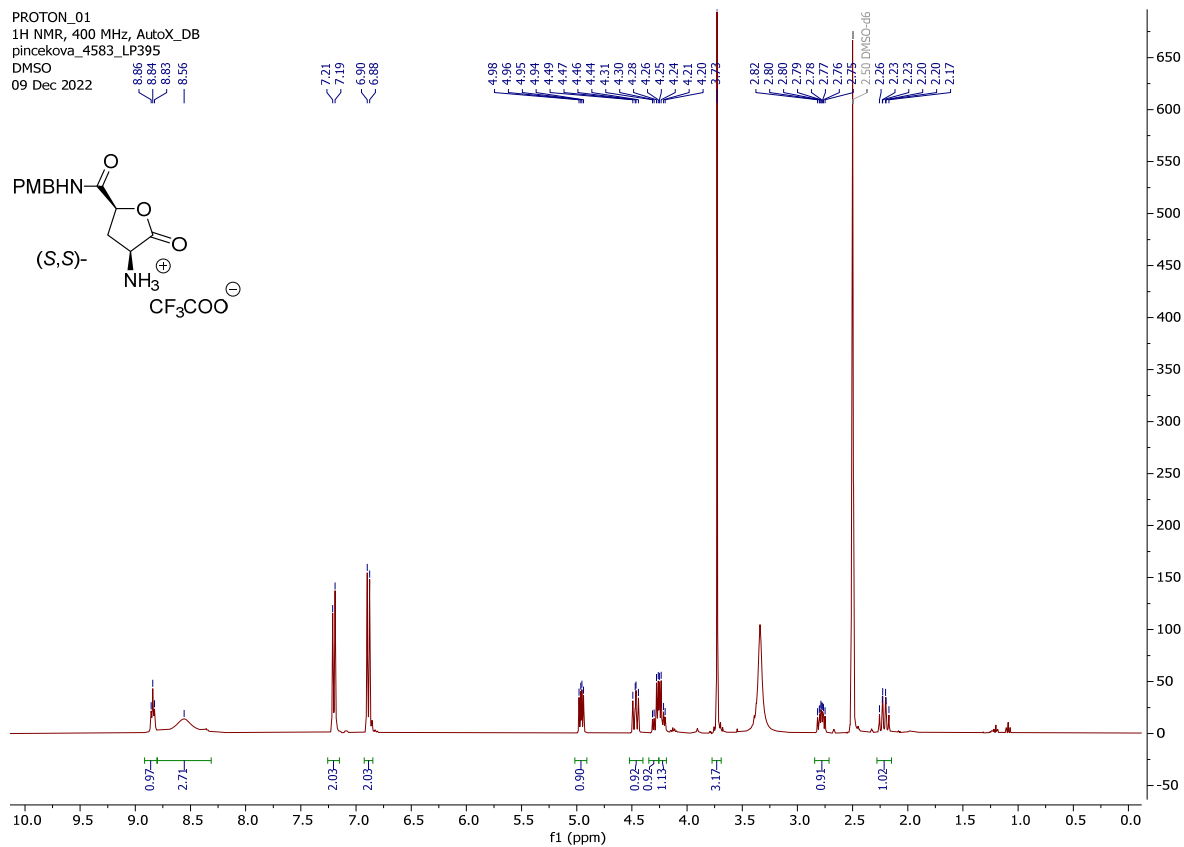

PROTON\_01  
 1H NMR, 400 MHz, AutoX\_DB  
 pincekova\_4693\_LP422-amine  
 DMSO  
 15 Dec 2022

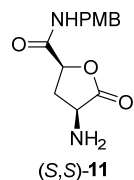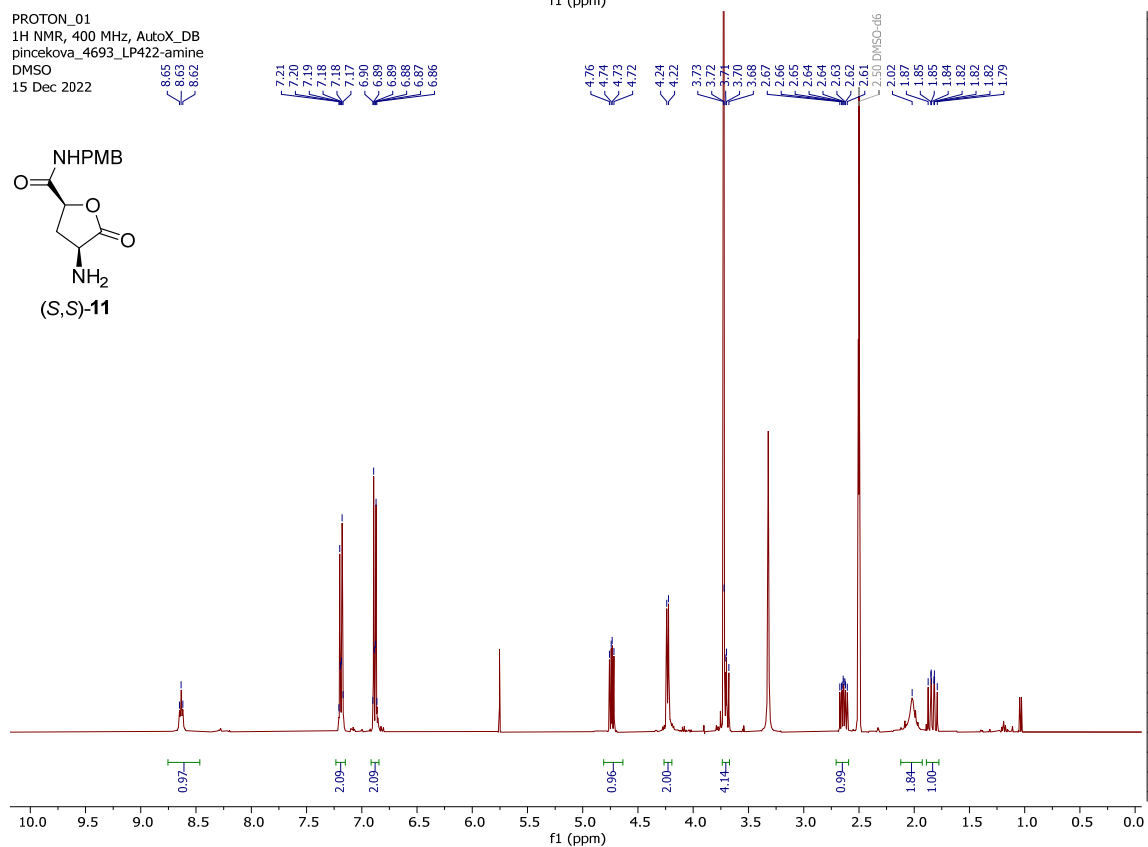

PROTON\_01  
 1H NMR, 400 MHz, AutoX\_DB  
 pincekova\_0096\_LP438  
 CDCl3  
 12 Jan 2023

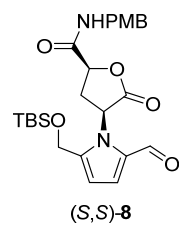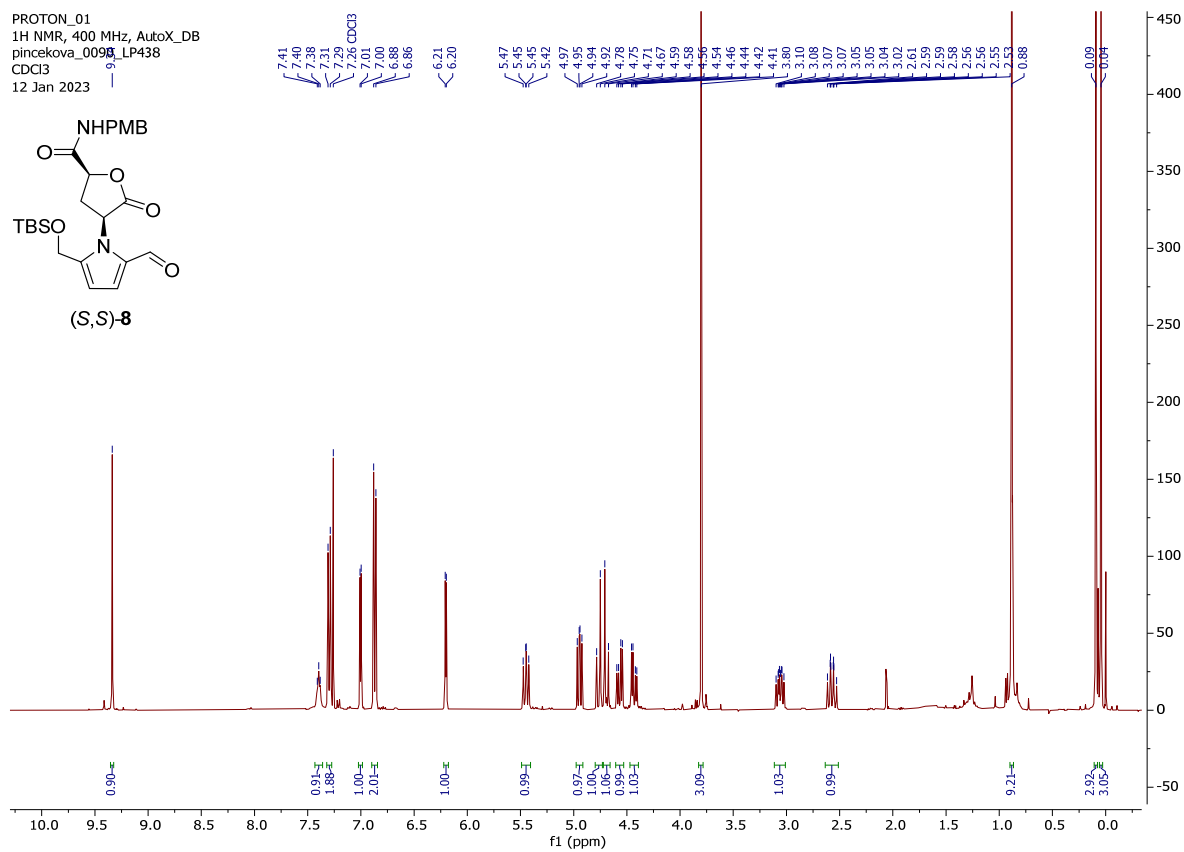

PROTON\_01  
 1H NMR, 400 MHz, AutoX\_DB  
 pincekova\_0190\_LP437  
 DMSO  
 18 Jan 2023

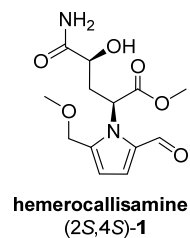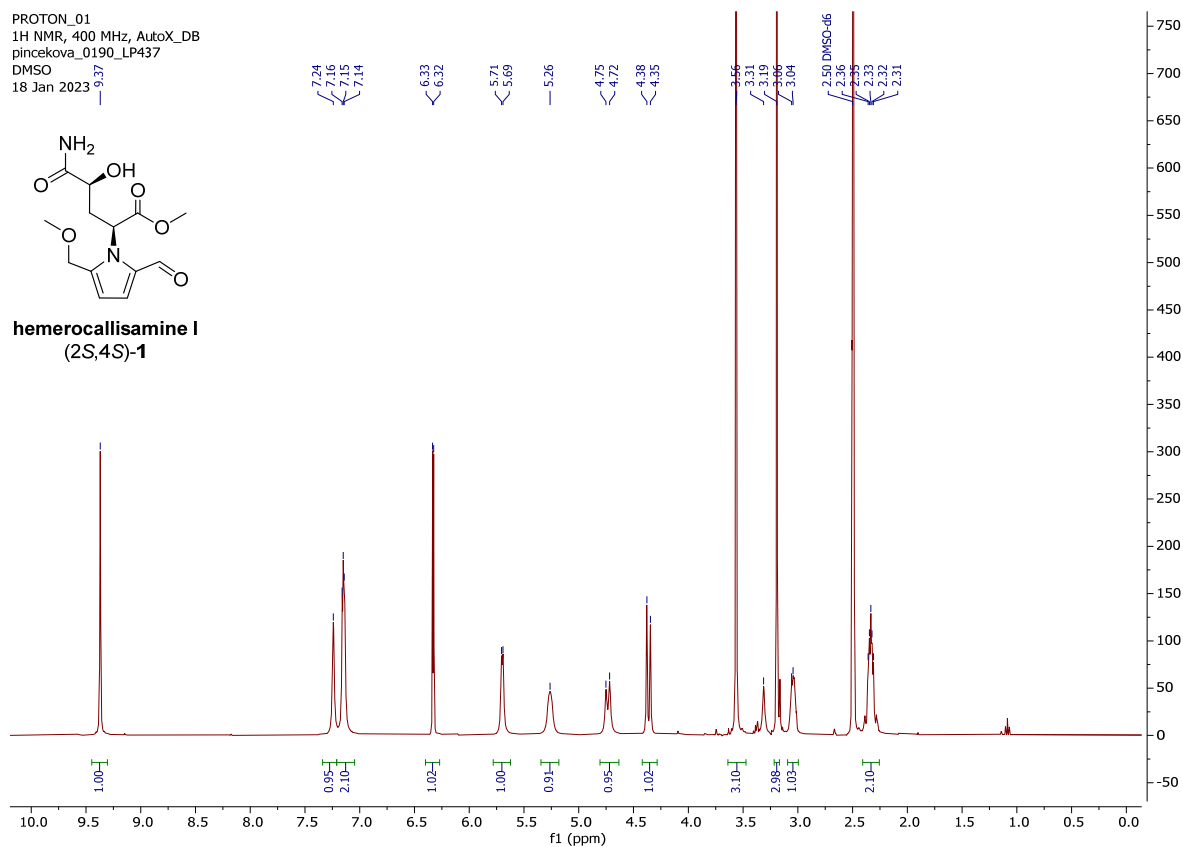

CARBON\_01  
 13C NMR, 100 MHz, AutoX\_DB  
 pincekova\_0190\_LP437  
 DMSO  
 18 Jan 2023

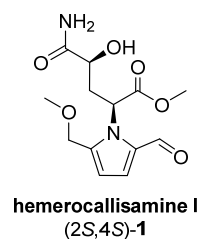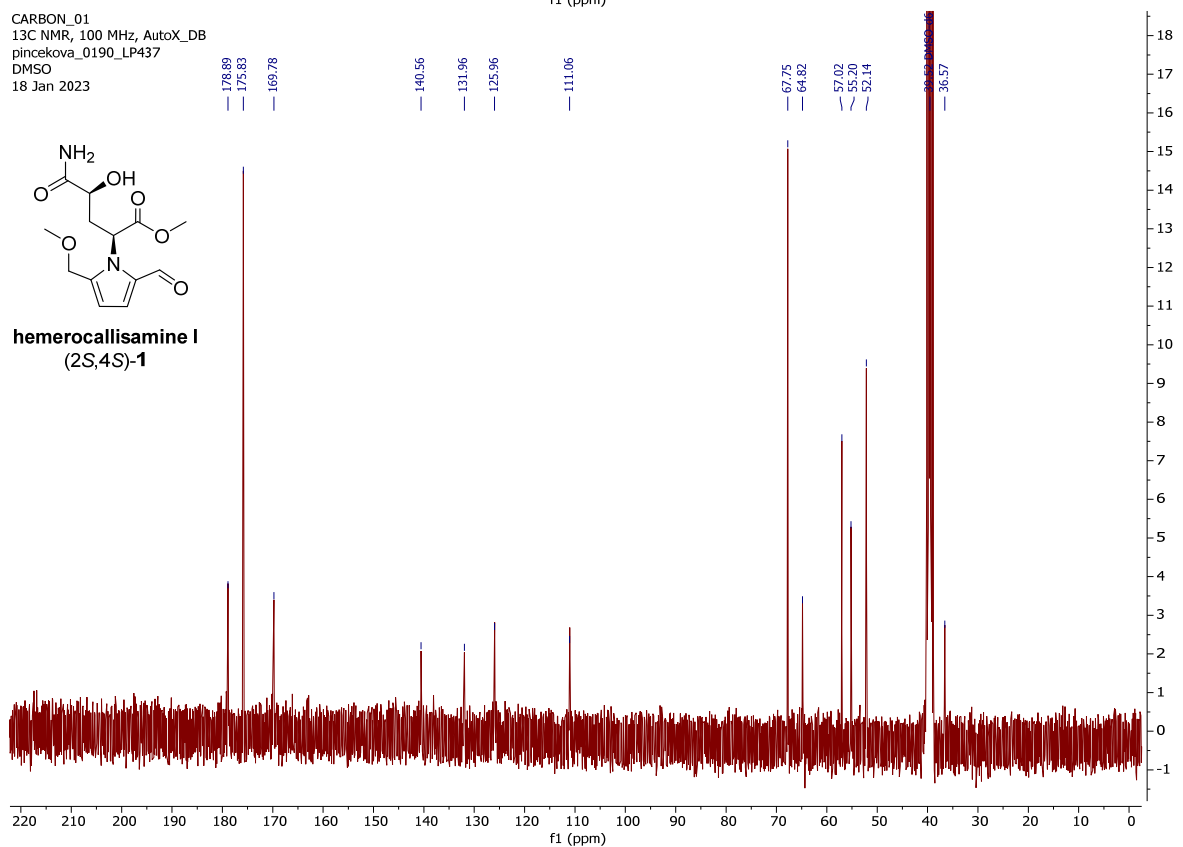

1. Sarkar, S. K.; Upul Ranaweera, R. A.; Merugu, R.; Abdelaziz, N. M.; Robinson, J.; Day, H. A.; Krause, J. A.; Gudmundsdottir, A. D., Comparison of the Photochemistry of Acyclic and Cyclic 4-(4-Methoxy-phenyl)-4-oxo-but-2-enoate Ester Derivatives. *The Journal of Physical Chemistry A* **2020**, *124* (37), 7346-7354.
2. Subbiah, S.; Simeonov, S. P.; Esperança, J. M.; Rebelo, L. P. N.; Afonso, C. A., Direct transformation of 5-hydroxymethylfurfural to the building blocks 2, 5-dihydroxymethylfurfural (DHMF) and 5-hydroxymethyl furanoic acid (HMFA) via Cannizzaro reaction. *Green chemistry* **2013**, *15* (10), 2849-2853.
3. Geng, H. M.; Stubbing, L. A.; Li-yang Chen, J.; Furkert, D. P.; Brimble, M. A., Synthesis of the revised structure of acortatarin A. *European Journal of Organic Chemistry* **2014**, *2014* (28), 6227-6241.
4. Sheldrick, G. M., SHELXT—Integrated space-group and crystal-structure determination. *Acta Crystallographica Section A: Foundations and Advances* **2015**, *71* (1), 3-8.
5. Sheldrick, G. M., Crystal structure refinement with SHELXL. *Acta Crystallographica Section C: Structural Chemistry* **2015**, *71* (1), 3-8.
